# Supplementary material for: Review of genetic testing in kidney disease patients: Diagnostic yield of single nucleotide variants and copy number variations evaluated across and within kidney phenotype groups
Source: PubMed Central journal article supplement — Am J Med Genet C Semin Med Genet. 2022 Sep 26;190(3):358–76. doi: 10.1002/ajmg.c.31995 (PMC9828643; doi:10.1002/ajmg.c.31995), 2022-09-26
Supplement: AJMG-190-358-s001.pdf [file AJMG-190-358-s001.pdf]

A

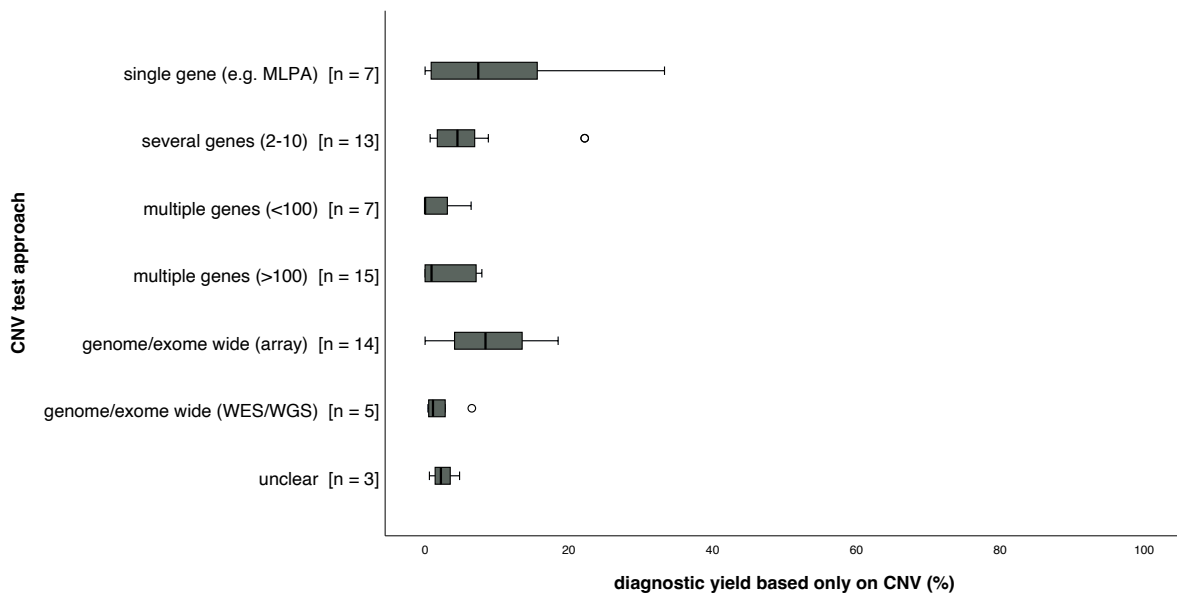

B

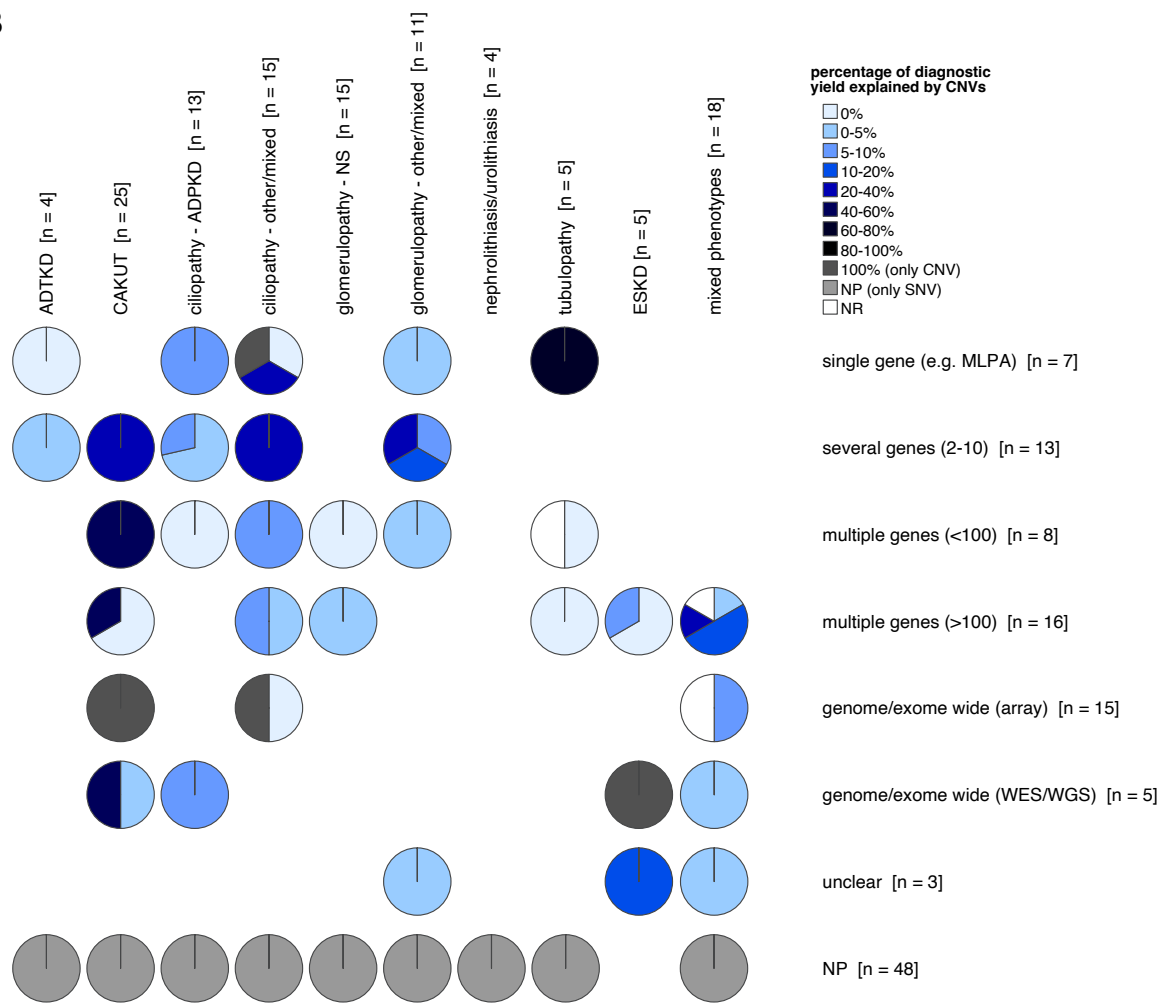

|                             | ADTKD    | CAKUT     | ciliopathy - ADPKD | ciliopathy - other/mixed | glomerulopathy - NS | glomerulopathy - other/mixed | nephrolithiasis/uroolithiasis | tubulopathy | ESKD     | mixed phenotypes | Total      |
|-----------------------------|----------|-----------|--------------------|--------------------------|---------------------|------------------------------|-------------------------------|-------------|----------|------------------|------------|
| single gene (e.g. MLPA)     | 1        | 0         | 1                  | 3                        | 0                   | 1                            | 0                             | 1           | 0        | 0                | 7          |
| several genes (2-10)        | 1        | 1         | 7                  | 1                        | 0                   | 3                            | 0                             | 0           | 0        | 0                | 13         |
| multiple genes (<100)       | 0        | 1         | 1                  | 1                        | 2                   | 1                            | 0                             | 2           | 0        | 0                | 8          |
| multiple genes (>100)       | 0        | 3         | 0                  | 2                        | 1                   | 0                            | 0                             | 1           | 3        | 6                | 16         |
| genome/exome wide (array)   | 0        | 11        | 0                  | 2                        | 0                   | 0                            | 0                             | 0           | 0        | 2                | 15         |
| genome/exome wide (WES/WGS) | 0        | 2         | 1                  | 0                        | 0                   | 0                            | 0                             | 0           | 1        | 1                | 5          |
| unclear                     | 0        | 0         | 0                  | 0                        | 0                   | 1                            | 0                             | 0           | 1        | 1                | 3          |
| NP                          | 2        | 7         | 3                  | 6                        | 12                  | 5                            | 4                             | 1           | 0        | 8                | 48         |
| <b>Total</b>                | <b>4</b> | <b>25</b> | <b>13</b>          | <b>15</b>                | <b>15</b>           | <b>11</b>                    | <b>4</b>                      | <b>5</b>    | <b>5</b> | <b>18</b>        | <b>115</b> |
