# Supplementary material for: Review of genetic testing in kidney disease patients: Diagnostic yield of single nucleotide variants and copy number variations evaluated across and within kidney phenotype groups
Source: PubMed Central journal article supplement — Am J Med Genet C Semin Med Genet. 2022 Sep 26;190(3):358–76. doi: 10.1002/ajmg.c.31995 (PMC9828643; doi:10.1002/ajmg.c.31995), 2022-09-26
Supplement: AJMG-190-358-s003.pdf [file AJMG-190-358-s003.pdf]

**Supplementary Table 1a – summary of individual ADTKD studies.** Patient, cohort and test characteristics per study are presented. Diagnostic yield and percentage of diagnostic yield that is explained by CNVs are summarized. In grey font additional info on phenotypes, extrapolated cohort and diagnostic yield for both of these are presented if available. A summary of noteworthy details is presented per study, including patient characteristics that are expected to have positively impacted the diagnostic yield. Abbreviations are listed in Supplementary Table 2.

| ADTKD                                                                                                                                                                                                                                                                       | phenotype                                                                                                                                                                                                                            | n of population                                                                                                 | pediatric / adult at time of study | positive family history (n, %)               | consang. (n, %) | extra-renal features (n, %) | adult-onset disease (n, %)                                    | ESKD (n, %)                                                | type of variants tested                   | n genes analyzed              | diagnostic yield (n, %)                                                                                                                                                                                                                                                        | percentage of yield by CNV (%) |
|-----------------------------------------------------------------------------------------------------------------------------------------------------------------------------------------------------------------------------------------------------------------------------|--------------------------------------------------------------------------------------------------------------------------------------------------------------------------------------------------------------------------------------|-----------------------------------------------------------------------------------------------------------------|------------------------------------|----------------------------------------------|-----------------|-----------------------------|---------------------------------------------------------------|------------------------------------------------------------|-------------------------------------------|-------------------------------|--------------------------------------------------------------------------------------------------------------------------------------------------------------------------------------------------------------------------------------------------------------------------------|--------------------------------|
| [Ayasreh et al., 2018]                                                                                                                                                                                                                                                      | referred with ADTKD                                                                                                                                                                                                                  | 56 families                                                                                                     | NR                                 | NR                                           | NR              | NR                          | NR                                                            | NR                                                         | SNVs + CNVs                               | 4                             | 25/56 (44.6%)                                                                                                                                                                                                                                                                  | 0%                             |
| <i>Noteworthy: phenotype data only reported for mutation positive families therefore not included in table</i>                                                                                                                                                              |                                                                                                                                                                                                                                      |                                                                                                                 |                                    |                                              |                 |                             |                                                               |                                                            |                                           |                               |                                                                                                                                                                                                                                                                                |                                |
| [Gast et al., 2018]                                                                                                                                                                                                                                                         | genetic testing performed in patients with no established conflicting genetic diagnosis<br><br>ADTKD n=28; unknown familial nephropathy n=44 of which n=33 consistent with ADTKD; others genotyped included GN; FSGS, IgA and reflux | 113<br><br>(from CKD3-5 cohort of n=3770, n=399 MKD suspected 2027 replied to questionnaire)                    | adult                              | min. 217/399 (54.4%)<br><br>217/2027 (10.7%) | NR              | NR                          | NR, mean 68 years for all responders at time of questionnaire | 269/399 (67.4%)<br><br>72/2027 (38.1%)   1425/3770 (37.8%) | SNVs<br><br>1 or custom gene panel in n=3 | 1 or custom gene panel in n=3 | 35/113 (31.0%)<br><br>35/3770 (0.9%) of CKD 3+   29/1425 (2.0%) of ESKD   35/399 (8.7%) of inherited kidney disease (24% of inherited kidney disease minus ADPKD)<br><br>unknown familial nephropathy 13/44 (29.5%); unknown with ADTKD 13/33 (39.4%); all ADTKD 35/61 (57.4%) | NP                             |
| <i>Noteworthy: 252/399 (63.2%) ADPKD   also other (suspected) genetic diagnosis reported (without causative gene): most prevalent AS in 25/399 (6.3%) &amp; FSGS/SRNS in 13/399 (3.3%)   authors reported only yield for UMOD   yield impacted by: family history; ESKD</i> |                                                                                                                                                                                                                                      |                                                                                                                 |                                    |                                              |                 |                             |                                                               |                                                            |                                           |                               |                                                                                                                                                                                                                                                                                |                                |
| [Bleyer et al., 2020]                                                                                                                                                                                                                                                       | patient referred with ADTKD (either by health care professional or self-referral n=176)                                                                                                                                              | 665 individuals (from 828 referrals of which 77 had prior genetic diagnosis) - genetic testing performed in 275 | adult for first affected contacts  | min. 456/629 (72.4%)                         | NR              | NR                          | NR                                                            | NR                                                         | SNVs                                      | 5                             | 172/275 (62.5%)<br><br>172/665 (25.9%) of potential participants   249/823 (30.3%) of referred patients                                                                                                                                                                        | NP                             |
| <i>Noteworthy: limited information provided for type of genetic test performed and unclear if more than 5 genes were tested   criteria for variant classification NR</i>                                                                                                    |                                                                                                                                                                                                                                      |                                                                                                                 |                                    |                                              |                 |                             |                                                               |                                                            |                                           |                               |                                                                                                                                                                                                                                                                                |                                |
| [Olinger et al., 2020]                                                                                                                                                                                                                                                      | presumptive diagnosis of ADTKD                                                                                                                                                                                                       | 585 families (726 individuals)                                                                                  | NR                                 | NR                                           | NR              | NR                          | NR, median 45 years (IQR 31, 58)                              | 216/503 (42.9%)                                            | SNVs + CNVs                               | 1 and/or 2                    | 309/585 (52.8%)                                                                                                                                                                                                                                                                | 1.3%                           |
| <i>Noteworthy: UMOD testing n=562 (solely UMOD in 357); MUC1 testing n=228 (solely MUC1 in 23)</i>                                                                                                                                                                          |                                                                                                                                                                                                                                      |                                                                                                                 |                                    |                                              |                 |                             |                                                               |                                                            |                                           |                               |                                                                                                                                                                                                                                                                                |                                |

**Supplementary Table 1b – summary of individual CAKUT studies.** Patient, cohort and test characteristics per study are presented. Diagnostic yield and percentage of diagnostic yield that is explained by CNVs are summarized. In grey font additional info on phenotypes, extrapolated cohort and diagnostic yield for both of these are presented if available. A summary of noteworthy details is presented per study, including patient characteristics that are expected to have positively impacted the diagnostic yield. Abbreviations are listed in Supplementary Table 2.

| CAKUT                                                                                                                                                                                                                                                                                               | phenotype                                                                                                                                                                    | n of population                                                     | pediatric / adult at time of study | positive family history (n, %) | consang. (n, %) | extra-renal features (n, %) | adult-onset disease (n, %) | ESKD (n, %) | type of variants tested | n genes analyzed | diagnostic yield (n, %)                                                                                                                        | percentage of yield by CNV (%) |
|-----------------------------------------------------------------------------------------------------------------------------------------------------------------------------------------------------------------------------------------------------------------------------------------------------|------------------------------------------------------------------------------------------------------------------------------------------------------------------------------|---------------------------------------------------------------------|------------------------------------|--------------------------------|-----------------|-----------------------------|----------------------------|-------------|-------------------------|------------------|------------------------------------------------------------------------------------------------------------------------------------------------|--------------------------------|
| [Sanna-Cherchi et al., 2012]                                                                                                                                                                                                                                                                        | Renal agenesis or hypodysplasia                                                                                                                                              | 522                                                                 | pediatric                          | 96/388 (24.7%)                 | NR              | 142/522 (27.2%)             | 0%                         | NR          | CNVs                    | genome wide      | 55/522 (10.5%)                                                                                                                                 | 100%                           |
| <i>Noteworthy: combination of n=192 discovery cohort, n=196 and n=134 replication cohort   None of the cases was screened for mutations in known genes, such as PAX2, HNF1B, EYA1   yield impacted by: extra-urinary tract malformations</i>                                                        |                                                                                                                                                                              |                                                                     |                                    |                                |                 |                             |                            |             |                         |                  |                                                                                                                                                |                                |
| [Hwang et al., 2014]                                                                                                                                                                                                                                                                                | isolated CAKUT<br>VUR n=288; renal hypodysplasia n=120; unilateral renal agenesis n=90                                                                                       | 650 families (749 individuals)                                      | both                               | 100/650 (15.4%)                | NR              | 0%                          | 0%                         | NR          | SNVs                    | 17               | 41/650 (6.3%)                                                                                                                                  | NP                             |
| <i>Noteworthy: patients with syndromic CAKUT were excluded</i>                                                                                                                                                                                                                                      |                                                                                                                                                                              |                                                                     |                                    |                                |                 |                             |                            |             |                         |                  |                                                                                                                                                |                                |
| [Kohl et al., 2014]                                                                                                                                                                                                                                                                                 | isolated CAKUT                                                                                                                                                               | 590 families (672 individuals)                                      | NR                                 | NR                             | NR              | NR                          | 0%                         | NR          | SNVs                    | 12 (AR genes)    | 15/590 (2.5%)                                                                                                                                  | NP                             |
| <i>Noteworthy: mutations in 17 known autosomal dominant CAKUT-causing genes were excluded before this study</i>                                                                                                                                                                                     |                                                                                                                                                                              |                                                                     |                                    |                                |                 |                             |                            |             |                         |                  |                                                                                                                                                |                                |
| [Caruana et al., 2015]                                                                                                                                                                                                                                                                              | CAKUT - consecutive series<br>MCDK n=10; PUV n=29; VUR n=29; hypo/dysplasia n=23; hydronephroureterosis n=17; PUJ obst n=26; duplex kidney n=25; agenesis n=10; VUJ obst n=9 | 195 unrelated families (201 individuals)<br>- test performed in 178 | pediatric                          | 31/195 (16.4%)                 | NR              | 20.5% (n/n NR)              | 0%                         | NR          | CNVs                    | genome wide      | 7/178 (3.9%)<br>7/195 (3.6%) in entire cohort<br>VUR 2/29 (6.9%);<br>PUV 2/29 (6.9%);<br>hydronephroureterosis 2/17 (11.8%); MCDK 1/10 (10.0%) | 100%                           |
| <i>Noteworthy: patients were not screened for mutations in any known CAKUT-causing genes   yield impacted by: phenotype MCDK and PUV higher incidence of CNV</i>                                                                                                                                    |                                                                                                                                                                              |                                                                     |                                    |                                |                 |                             |                            |             |                         |                  |                                                                                                                                                |                                |
| [Nicolaou et al., 2016]                                                                                                                                                                                                                                                                             | CAKUT                                                                                                                                                                        | 453                                                                 | pediatric                          | 44/453 (9.7%)                  | NR              | 64/453 (14.1%)              | 0%                         | NR          | SNVs + CNVs             | 208              | 6/453 (1.3%)                                                                                                                                   | 0%                             |
| <i>Noteworthy: using a burden test, no significant excess of rare variants in any of the genes in our cohort compared with controls was found   paper also describes candidate variants of pathogenicity, these are not included in the yield reported here   yield impacted by: family history</i> |                                                                                                                                                                              |                                                                     |                                    |                                |                 |                             |                            |             |                         |                  |                                                                                                                                                |                                |

[Xi et al., 2016] MCDK 37 pediatric NR NR 4/37 (10.8%) 0% NR CNVs genome wide 5/37 (13.5%) 100%  
 isolated MCDK n=33; non-isolated MCDK n=4  
 isolated 4/33 (12.1%); non-isolated 1/4 (25.0%)

*Noteworthy: yield impacted by: extra-renal features*

[Faure et al., 2016] PUV 45 pediatric NR NR NR 0% 7/45 (15.6%) CNVs genome wide 2/45 (4.4%) 100%

*Noteworthy: patients with known chromosomal abnormalities were excluded | yield impacted by: CKD5*

[Fu et al., 2016] MCDK 72 (of 370 with CAKUT in consecutive cohort) fetuses NR NR 10/72 (13.9%) 0% NR CNVs genome wide 8/72 (11.1%) 100%  
 8/370 (2.2%) in entire CAKUT cohort

*Noteworthy: karyotyping performed in n=72, CMA performed in n=30; yield karyotyping: 3/72 (4.2%) - CMA: 5/30 (16.7%) | yield impacted by: bilateral MCDK; extra renal abnormalities*

[Vivante et al., 2017] CAKUT 33 families (33 individuals) NR NR 100% NR 0% NR SNVs exome wide 9/33 (27.1%) NP

*Noteworthy: mutations in 17 genes known to be mutated in isolated CAKUT in humans were excluded previously in this cohort | A clinical diagnosis of a known monogenic syndrome had not been previously made in any of the patients | AGXT, AQP2, CTNS, and PKHD1 cause, if mutated, a kidney disease that may represent a phenocopy of CAKUT.*

[Bekheirnia et al., 2017] CAKUT 62 families both 10/62 (16.1%) NR 19/31 (30.6%) 0% NR SNVs + CNVs 35 7/62 (11.3%) 57.1%

*Noteworthy: exclusion criterium: individuals with syndromic forms of CAKUT in which an underlying genetic etiology was known and individuals with nonsyndromic and nonfamilial forms of VUR | \*two more syndromic families were identified after WES results became available; accordingly, total syndromic = 21 (34%) | FOXP1 identified as CAKUT candidate gene (not included in yield)*

[Heidet et al., 2017] CAKUT (bilateral or unilateral with extra-renal defects or positive family history) + 11 patients with BOR without a renal phenotype - severe fetal cases n=93 (45%) both 70/204 (34.3%) NR 79/204 (38.7%) 0% NR SNVs + CNVs 330 36/204 (17.6%) 44.4%  
 3/11 (27.3%) for BOR without renal phenotype

*Noteworthy: patients with posterior urethral valves were not included in the study | 50/204 patients had been previously tested negative for mutations in HNF1B and/or PAX2 (involved in papillorenal syndrome) and/or EYA1 by Sanger sequencing; 9 fetuses had been tested for mutations in RET*

[Lei et al., 2017] CAKUT 30 fetuses NR 0% 8/30 (26.7%) 0% N/A SNVs exome wide 4/30 (13.3%) NP  
 isolated CAKUT 2/22 (9.1%); CAKUT with other abnormalities 2/8 (25%)

*Noteworthy: fetuses had normal findings upon karyotyping and chromosome microarray analysis | yield impacted by: extra-renal features*

|                                                                                                                                                                                                                                                                                                                     |                                                                                                                                                                                                   |                                                              |         |                                               |                                                                                       |                  |    |     |             |                                           |                                                                                                                                                      |       |
|---------------------------------------------------------------------------------------------------------------------------------------------------------------------------------------------------------------------------------------------------------------------------------------------------------------------|---------------------------------------------------------------------------------------------------------------------------------------------------------------------------------------------------|--------------------------------------------------------------|---------|-----------------------------------------------|---------------------------------------------------------------------------------------|------------------|----|-----|-------------|-------------------------------------------|------------------------------------------------------------------------------------------------------------------------------------------------------|-------|
| [Rasmussen et al., 2018]                                                                                                                                                                                                                                                                                            | bilateral kidney anomalies                                                                                                                                                                        | 56 families (62 fetuses)                                     | fetuses | 11/56 (19.6%)                                 | 0%                                                                                    | NR               | 0% | NR  | SNVs + CNVs | 108 or exome wide                         | 7/56 (12.5%)                                                                                                                                         | 0%    |
| Noteworthy: GREB1L and ROBO1 identified as novel disease genes, adding these as solved patients increases the yield to 11/56 (19.6%)                                                                                                                                                                                |                                                                                                                                                                                                   |                                                              |         |                                               |                                                                                       |                  |    |     |             |                                           |                                                                                                                                                      |       |
| [Unzaki et al., 2018]                                                                                                                                                                                                                                                                                               | clinically diagnosed BOR syndrome                                                                                                                                                                 | 36 families (51 individuals)                                 | both    | 18/36 (50.0%)                                 | NR                                                                                    | 100%             | 0% | NR  | SNVs + CNVs | depending on findings: 2 to max 172 genes | 26/36 (72.2%)                                                                                                                                        | 30.7% |
| <i>Noteworthy: tiered approach</i>                                                                                                                                                                                                                                                                                  |                                                                                                                                                                                                   |                                                              |         |                                               |                                                                                       |                  |    |     |             |                                           |                                                                                                                                                      |       |
| [Boissel et al., 2018]                                                                                                                                                                                                                                                                                              | CAKUT (severe; from terminated pregnancies)                                                                                                                                                       | 101                                                          | fetuses | 9/101 (8.9%)                                  | 8/101 (7.9%)                                                                          | 90/101 (89.1%)   | 0% | N/A | SNVs        | exome wide                                | 19/101 (18.8%)                                                                                                                                       | NP    |
|                                                                                                                                                                                                                                                                                                                     | isolated bilateral renal agenesis or dysgenesis n=11; VACTERL n=9; cerebral anomalies n=36; suspected ciliopathies n=5; miscellaneous patterns of multiple malformations n=32; fetal akinesia n=8 |                                                              |         |                                               |                                                                                       |                  |    |     |             |                                           | ciliopathies (80%); cerebral anomalies (19%); multiple malformations (19%); fetal akinesia (25%); renal a/dysgenesis (0%); VACTERL association (11%) |       |
| <i>Noteworthy: neither karyotyping (n = 58 cases) nor chromosomal microarray analysis (n = 84 cases) showed any candidate or pathogenic CNVs   GREB1L identified as candidate gene (not included in yield)   yield impacted by: ciliopathies</i>                                                                    |                                                                                                                                                                                                   |                                                              |         |                                               |                                                                                       |                  |    |     |             |                                           |                                                                                                                                                      |       |
| [Van Der Ven et al., 2018]                                                                                                                                                                                                                                                                                          | CAKUT                                                                                                                                                                                             | 232 families (488 individuals: 319 affected; 169 unaffected) | both    | 40/232 (17.2%)<br>multiplex families included | reported 50/232 (21.6%); likely consanguinity 43/232 (18.5%); combined 93/232 (40.0%) | 79/319 (24.7%)   | 0% | NR  | SNVs + CNVs | 40/219/404 genes or exome wide            | 32/232 (13.8%)                                                                                                                                       | 3.1%  |
| <i>Noteworthy: genetic test depending on findings/homozygosity mapping/availability parental DNA family: tiered approach   In 61/232 (26.3%) candidate mutations   In 15/155 families with isolated CAKUT deleterious mutations detected in syndromic CAKUT genes   yield impacted by: syndromic, consanguinity</i> |                                                                                                                                                                                                   |                                                              |         |                                               |                                                                                       |                  |    |     |             |                                           |                                                                                                                                                      |       |
| [Li et al., 2019]                                                                                                                                                                                                                                                                                                   | fetuses with CAKUT referred for invasive prenatal diagnosis                                                                                                                                       | 123                                                          | fetuses | NR                                            | NR                                                                                    | 87/123 (70.7%)   | 0% | NR  | CNVs        | genome wide                               | 17/123 (13.8%)                                                                                                                                       | 100%  |
| <i>Noteworthy: incremental yield of CMA over karyotyping was 3.6%   meta-analysis indicates that the incremental yield of CMA over karyotyping was 3.8%   yield impacted by: non-isolated CAKUT</i>                                                                                                                 |                                                                                                                                                                                                   |                                                              |         |                                               |                                                                                       |                  |    |     |             |                                           |                                                                                                                                                      |       |
| [Verbitsky et al., 2019]                                                                                                                                                                                                                                                                                            | CAKUT                                                                                                                                                                                             | 2824                                                         | both    | 413/2824 (14.6%)                              | 4/125                                                                                 | 570/2824 (20.2%) | 0% | NR  | CNVs        | genome wide                               | 159/2824 (5.6%)                                                                                                                                      | 100%  |

*Noteworthy: affected individuals carried a significant burden of rare exonic CNVs and were enriched for known genomic disorders (GD). Kidney anomaly cases were most enriched for exonic CNVs, encompassing GD-CNVs and novel deletions; obstructive uropathy had a lower CNV burden and an intermediate prevalence of GD-CNVs; and vesicoureteral reflux had the fewest GD-CNVs but was enriched for novel exonic CNVs, particularly duplications. | yield impacted by: extra-renal features and multiple urinary tract infections, phenotype: kidney anomalies*

|                    |                            |     |         |    |    |                 |    |    |      |             |                                                                 |      |
|--------------------|----------------------------|-----|---------|----|----|-----------------|----|----|------|-------------|-----------------------------------------------------------------|------|
| [Lin et al., 2019] | CAKUT - consecutive cohort | 331 | fetuses | NR | NR | 123/331 (37.2%) | 0% | NR | CNVs | genome wide | 25/331 (7.6%)                                                   | 100% |
|                    |                            |     |         |    |    |                 |    |    |      |             | isolated CAKUT 10/208 (4.8%); non-isolated CAKUT 15/123 (12.2%) |      |

*Noteworthy: fetuses with a previously known family history of autosomal recessive or dominant polycystic kidney disease were not included in the study (n not reported) | yield impacted by: extra-renal features*

|                     |       |     |         |    |    |                |    |    |      |             |                                                               |      |
|---------------------|-------|-----|---------|----|----|----------------|----|----|------|-------------|---------------------------------------------------------------|------|
| [Cai et al., 2020a] | CAKUT | 147 | fetuses | NR | NR | 22/147 (15.0%) | 0% | NR | CNVs | genome wide | 6/147 (4.1%)                                                  | 100% |
|                     |       |     |         |    |    |                |    |    |      |             | isolated CAKUT 4/125 (3.2%)<br>non-isolated CAKUT 2/22 (9.1%) |      |

*Noteworthy: pathogenic CNV inherited from unaffected mother might present incomplete penetrance | yield impacted by: extra-renal features*

|                    |       |    |      |             |    |               |    |               |             |    |               |       |
|--------------------|-------|----|------|-------------|----|---------------|----|---------------|-------------|----|---------------|-------|
| [Ahn et al., 2020] | CAKUT | 94 | both | 5/94 (5.3%) | NR | 62/94 (66.0%) | 0% | 40/94 (42.6%) | SNVs + CNVs | 60 | 13/94 (13.8%) | 46.2% |
|--------------------|-------|----|------|-------------|----|---------------|----|---------------|-------------|----|---------------|-------|

*Noteworthy: only CNVs involving captured areas of TES were searched | yield impacted by: syndromic features*

|                    |                                                  |                                                               |         |              |    |                |    |    |      |            |                                                                                                                 |    |
|--------------------|--------------------------------------------------|---------------------------------------------------------------|---------|--------------|----|----------------|----|----|------|------------|-----------------------------------------------------------------------------------------------------------------|----|
| [Lei et al., 2020] | CAKUT (tertiary level referral center)           | 163 fetus-parental trios (of 725 CAKUT cases in total cohort) | fetuses | 1/163 (0.6%) | 0% | 37/163 (22.7%) | 0% | NR | SNVs | exome wide | 20/163 (12.3%)                                                                                                  | NP |
|                    | isolated CAKUT n=125; multisystem anomalies n=37 |                                                               |         |              |    |                |    |    |      |            | 105/725 (14.5%) in entire CAKUT cohort<br><br>isolated CAKUT 10/125 (8.0%); multisystem anomalies 10/37 (27.0%) |    |

*Noteworthy: familial cases were excluded, however later found out that mother of one case had polycystic kidneys | previously normal findings upon karyotyping and CMA in this cohort (from larger cohort of 725 fetuses with CAKUT, 33 had abnormal karyotype, 52 had abnormal CMA, 457 declined genetic testing/CMA/WES, 20 insufficient DNA). Yield extrapolated to cohort where genetic testing was performed (CMA/karyotype included): 105/248 (42.3%); yield in entire cohort: 105/725 (14.5%) | yield impacted by: extra-renal features*

|                     |                                                                            |    |         |             |    |    |    |    |      |            |                                                                                         |    |
|---------------------|----------------------------------------------------------------------------|----|---------|-------------|----|----|----|----|------|------------|-----------------------------------------------------------------------------------------|----|
| [Zhou et al., 2020] | unexplained isolated CAKUT                                                 | 41 | fetuses | 1/41 (2.4%) | 0% | 0% | 0% | NR | SNVs | exome wide | 3/41 (7.3%)                                                                             | NP |
|                     | bilateral kidney anomalies n=19; unilateral fetal renal abnormalities n=22 |    |         |             |    |    |    |    |      |            | bilateral kidney anomalies 3/19 (15.8%); unilateral fetal renal abnormalities 0/22 (0%) |    |

*Noteworthy: fetuses whose tests revealed aneuploidy or CNVs which justified the fetal anomalous phenotypes, were excluded from analyses | 28 cases with parent/fetus trio; 13 cases only proband | yield impacted by: bilateral kidney anomalies*

|                     |                                           |     |         |    |    |                |    |    |      |             |                             |      |
|---------------------|-------------------------------------------|-----|---------|----|----|----------------|----|----|------|-------------|-----------------------------|------|
| [Cai et al., 2020b] | RHD                                       | 120 | fetuses | NR | NR | 17/120 (14.2%) | 0% | NR | CNVs | genome wide | 11/120 (9.2%)               | 100% |
|                     | isolated RHD n=103; non-isolated RHD n=17 |     |         |    |    |                |    |    |      |             | isolated RHD 10/103 (9.7%); |      |

non-isolated RHD 5/17  
(29.4%)

*Noteworthy: yield impacted by: extra-renal features*

|                     |                                                                                                                  |    |         |    |    |    |    |    |      |             |               |      |
|---------------------|------------------------------------------------------------------------------------------------------------------|----|---------|----|----|----|----|----|------|-------------|---------------|------|
| [Zhou et al., 2021] | fetuses with solitary functioning kidney on ultrasound - including MCDK, RHD, URA, ectopic kidney, duplex kidney | 99 | fetuses | NR | NR | NR | 0% | NR | CNVs | genome wide | 14/99 (14.1%) | 100% |
|---------------------|------------------------------------------------------------------------------------------------------------------|----|---------|----|----|----|----|----|------|-------------|---------------|------|

*Noteworthy: QPRT identified as candidate gene*

---

**Supplementary Table 1c – summary of individual ciliopathy studies.** Patient, cohort and test characteristics per study are presented. Diagnostic yield and percentage of diagnostic yield that is explained by CNVs are summarized. In grey font additional info on phenotypes, extrapolated cohort and diagnostic yield for both of these are presented if available. A summary of noteworthy details is presented per study, including patient characteristics that are expected to have positively impacted the diagnostic yield. Abbreviations are listed in Supplementary Table 2.

| ciliopathies                                                                                                                                                                                                                                                                                                     | phenotype                             | n of population                    | pediatric / adult at time of study | positive family history (n, %) | consang. (n, %) | extra-renal features (n, %) | adult-onset disease (n, %)                             | ESKD (n, %)                 | type of variants tested | n genes analyzed | diagnostic yield (n, %)                                                                | percentage of yield by CNV (%) |
|------------------------------------------------------------------------------------------------------------------------------------------------------------------------------------------------------------------------------------------------------------------------------------------------------------------|---------------------------------------|------------------------------------|------------------------------------|--------------------------------|-----------------|-----------------------------|--------------------------------------------------------|-----------------------------|-------------------------|------------------|----------------------------------------------------------------------------------------|--------------------------------|
| <b>ADPKD</b>                                                                                                                                                                                                                                                                                                     |                                       |                                    |                                    |                                |                 |                             |                                                        |                             |                         |                  |                                                                                        |                                |
| [Rossetti et al., 2012]                                                                                                                                                                                                                                                                                          | ADPKD                                 | 230                                | NR                                 | NR                             | NR              | NR                          | NR                                                     | NR                          | SNVs                    | 2                | 115/183 (62.8%)                                                                        | NP                             |
| <i>Noteworthy: yield is based on 183/230 patients with typical ADPKD</i>                                                                                                                                                                                                                                         |                                       |                                    |                                    |                                |                 |                             |                                                        |                             |                         |                  |                                                                                        |                                |
| [Hwang et al., 2016]                                                                                                                                                                                                                                                                                             | ADPKD                                 | 220 families<br>(of cohort of 288) | adult                              | NR                             | NR              | NR                          | 100%                                                   | 31.6%                       | SNVs + CNVs             | 2                | 186/220 (84.5%)<br><br>188/288 (65.3%) in entire at risk or affected with ADPKD cohort | 1.6%                           |
| <i>Noteworthy: exclusion criterium: serum creatinine &gt;1.4 mg/dl at presentation; entire cohort of 288 subjects at risk or affected with ADPKD (of which 2 were found to harbor HNF1B mutations)   yield impacted by: ESKD</i>                                                                                 |                                       |                                    |                                    |                                |                 |                             |                                                        |                             |                         |                  |                                                                                        |                                |
| [Jin et al., 2016]                                                                                                                                                                                                                                                                                               | ADPKD                                 | 148                                | both                               | 82/148 (55.4%)                 | NR              | NR                          | NR, mean 34 years (± 10.1 SD, range 12-66)             | NR                          | SNVs                    | 2                | 76/148 (51.4%)                                                                         | NP                             |
| <i>Noteworthy: yield impacted by: disease severity</i>                                                                                                                                                                                                                                                           |                                       |                                    |                                    |                                |                 |                             |                                                        |                             |                         |                  |                                                                                        |                                |
| [Kinoshita et al., 2016]                                                                                                                                                                                                                                                                                         | ADPKD                                 | 101                                | adult                              | NR                             | NR              | NR                          | NR, all >19 at time of testing                         | NR                          | SNVs + CNVs             | 2                | 94/101 (93.1%)                                                                         | 4.3%                           |
| [Xu et al., 2018]                                                                                                                                                                                                                                                                                                | ADPKD                                 | 120 families                       | NR                                 | NR                             | NR              | NR                          | NR                                                     | 42/73 (57.5%) before age 60 | SNVs + CNVs             | 2                | 98/120 (81.7%)                                                                         | 2.0%                           |
| <i>Noteworthy: yield based on probably pathogenic and definite pathogenic mutations. 69.9% had a definite pathogenic variant</i>                                                                                                                                                                                 |                                       |                                    |                                    |                                |                 |                             |                                                        |                             |                         |                  |                                                                                        |                                |
| [Fujimaru et al., 2018]                                                                                                                                                                                                                                                                                          | ADPKD without positive family history | 53                                 | adult                              | 0%                             | NR              | 40/53 (75.5%) liver cysts   | NR, mean 56 years (46-68) at time of genetic testing   | 10/53 (18.9%)               | SNVs + CNVs             | 69               | 35/53 (66.0%)                                                                          | 0%                             |
| <i>Noteworthy: those with extra-renal clinical findings related to renal cystic disease other than ADPKD (eg, hepatic fibrosis and retinitis pigmentosa) and those younger than 20 years of age were excluded   CKD5 reported separately 4/53 (7.5%) from ESKD   yield impacted by: polycystic liver disease</i> |                                       |                                    |                                    |                                |                 |                             |                                                        |                             |                         |                  |                                                                                        |                                |
| [Zhang et al., 2019]                                                                                                                                                                                                                                                                                             | ADPKD                                 | 62                                 | NR                                 | NR                             | NR              | NR                          | NR, mean age: PKD1 mutation: 43.5 years (± 10.6); PKD2 | 12/62 (19.4%)               | SNVs + CNVs             | 3                | 56/62 (90.3%)                                                                          | 1.8%                           |

mutation: 44.7  
years (± 6.6)

*Noteworthy: article includes VUS in detection rate of 95.2%. Mentioned diagnostic yield in this table based on LP and P mutations.*

|                          |       |     |    |    |    |    |    |    |             |   |                 |      |
|--------------------------|-------|-----|----|----|----|----|----|----|-------------|---|-----------------|------|
| [Mochizuki et al., 2019] | ADPKD | 111 | NR | NR | NR | NR | NR | NR | SNVs + CNVs | 2 | 102/111 (91.9%) | 4.9% |
|--------------------------|-------|-----|----|----|----|----|----|----|-------------|---|-----------------|------|

*Noteworthy: detection rate of NGS alone: 86.5%*

|                          |                 |                             |       |                 |    |                 |                     |                |             |    |                 |      |
|--------------------------|-----------------|-----------------------------|-------|-----------------|----|-----------------|---------------------|----------------|-------------|----|-----------------|------|
| [Mantovani et al., 2020] | suspected ADPKD | 191 (+21 validation cohort) | adult | 148/193 (76.7%) | NR | 128/159 (80.5%) | NR, median 25 years | 42/165 (25.5%) | SNVs + CNVs | 16 | 119/191 (62.3%) | 6.7% |
|--------------------------|-----------------|-----------------------------|-------|-----------------|----|-----------------|---------------------|----------------|-------------|----|-----------------|------|

*Noteworthy: validation cohort n=21; confirmation cohort severe ADPKD n=36, discovery cohort n=155 (total n=212). Patient characteristics are based on entire cohort. Yield based on confirmation cohort + discovery cohort | yield impacted by: severe disease (ESKD)*

|                          |       |                                |    |               |    |                |                                    |                |             |                                      |                |      |
|--------------------------|-------|--------------------------------|----|---------------|----|----------------|------------------------------------|----------------|-------------|--------------------------------------|----------------|------|
| [Schönauer et al., 2020] | ADPKD | 100 families (122 individuals) | NR | 61/69 (88.4%) | NR | 93/122 (76.2%) | NR, mean current age of 56.7 years | 68/122 (55.7%) | SNVs + CNVs | 5 or exome wide in unsolved families | 84/100 (84.0%) | 7.1% |
|--------------------------|-------|--------------------------------|----|---------------|----|----------------|------------------------------------|----------------|-------------|--------------------------------------|----------------|------|

*Noteworthy: four potential candidate genes identified (TSC2, GLI2, ALG6, LRP5)*

|                                |                                                  |     |      |                |    |                |                                     |    |             |    |                |      |
|--------------------------------|--------------------------------------------------|-----|------|----------------|----|----------------|-------------------------------------|----|-------------|----|----------------|------|
| [Mallawaarachchi et al., 2021] | ADPKD (52% atypical) referred for diagnostic WGS | 144 | both | 64/141 (45.4%) | NR | 47/144 (32.6%) | 132/144 (91.7%) at time of referral | NR | SNVs + CNVs | 13 | 69/144 (47.9%) | 5.8% |
|--------------------------------|--------------------------------------------------|-----|------|----------------|----|----------------|-------------------------------------|----|-------------|----|----------------|------|

*Noteworthy: diagnostic rate of 81% in patients with typical ADPKD (98% with PKD1/PKD2 variants) and 60% in those with atypical features (56% PKD1/PKD2; 44% PKHD1/HNF1B/GANAB/ DNAJB11/PRKCSH/TSC2) | yield impacted by: typical ADPKD*

|                        |                 |                                                                  |      |    |    |    |                 |    |             |   |                 |           |
|------------------------|-----------------|------------------------------------------------------------------|------|----|----|----|-----------------|----|-------------|---|-----------------|-----------|
| [Nielsen et al., 2021] | suspected ADPKD | 118 (cohort of 147 with genetic testing for PKD1 / PKD2 / GANAB) | both | NR | NR | NR | 135/147 (91.8%) | NR | SNVs + CNVs | 3 | 103/118 (87.3%) | min. 6.8% |
|------------------------|-----------------|------------------------------------------------------------------|------|----|----|----|-----------------|----|-------------|---|-----------------|-----------|

103/147 (70.0%) in entire cohort where genetic testing was performed

*Noteworthy: paper also reports possibly pathogenic variants in diagnostic yield, which also includes VUS as classified by ACMG | yield impacted by: patients specifically indicated to be suspected of ADPKD*

|                       |                                                                                |                                       |                       |    |    |    |    |    |      |                                                          |               |    |
|-----------------------|--------------------------------------------------------------------------------|---------------------------------------|-----------------------|----|----|----|----|----|------|----------------------------------------------------------|---------------|----|
| [Durkie et al., 2021] | Patients referred for ADPKD genetic testing with onset before age of 18 months | 36 (from cohort of 51 with VEO-ADPKD) | perinatal / pediatric | NR | NR | NR | 0% | NR | SNVs | 2 or 17 (depending on time of testing); n=1 WES; n=1 WGS | 21/36 (58.3%) | NP |
|-----------------------|--------------------------------------------------------------------------------|---------------------------------------|-----------------------|----|----|----|----|----|------|----------------------------------------------------------|---------------|----|

36/51 (70.6%) in entire cohort VEO-ADPKD

*Noteworthy: patients with a clinical history not suggestive of ADPKD or with an alternative genetic diagnosis (n=15: 9 biallelic PKHD1 / 6 HNF1B deletion) were not included in sequencing. Yield 21/36 based on likely biallelic PKD1/2 (suppl table). In 20/21 extended cystogenes panel / WES / WGS performed which was negative | Nine infants had a single PKD1 variant (5P; 4 likely hypomorphic), these infants were reported as genetically unresolved*

---

**other/mixed ciliopathies**

---



|                                                                                                                                                                                                                                                                                                                                                                                                                                                                                                                                                                                                                                                                                        |                                                           |                                                                                |         |                |                |               |                                                  |    |                                   |                                              |                 |       |
|----------------------------------------------------------------------------------------------------------------------------------------------------------------------------------------------------------------------------------------------------------------------------------------------------------------------------------------------------------------------------------------------------------------------------------------------------------------------------------------------------------------------------------------------------------------------------------------------------------------------------------------------------------------------------------------|-----------------------------------------------------------|--------------------------------------------------------------------------------|---------|----------------|----------------|---------------|--------------------------------------------------|----|-----------------------------------|----------------------------------------------|-----------------|-------|
| [Bachmann-Gagescu et al., 2015]                                                                                                                                                                                                                                                                                                                                                                                                                                                                                                                                                                                                                                                        | JS                                                        | 375 families (440 individuals) (from cohort of 440 families (532 individuals)) | both    | 79/440 (17.9%) | 84/440 (19.1%) | 100%          | NR, mean 13.1 years (SD 1.9) at time of analysis | NR | SNVs                              | 27                                           | 232/375 (61.8%) | NP    |
| <p><i>Noteworthy: phenotypic analysis revealed that only 34% of individuals have a 'pure JS' phenotype. Retinal disease is present in 30% of individuals, renal disease in 25%, coloboma in 17%, polydactyly in 15%, liver fibrosis in 14% and encephalocele in 8%.   Despite satisfying our criteria (MAF&lt;0.2%, CADD&gt;11), the variants in 12 families did not meet the ACMG variant interpretation categories 1, 2 or 3 (2007 guidelines, comparable to P, LP and VUS current guidelines) --&gt; these are still included in reported yield, yield would be 220/375 (58.7%) if these were to be excluded   yield impacted by: positive family history and consanguinity</i></p> |                                                           |                                                                                |         |                |                |               |                                                  |    |                                   |                                              |                 |       |
| [Knopp et al., 2015]                                                                                                                                                                                                                                                                                                                                                                                                                                                                                                                                                                                                                                                                   | JS, JSRD, MKS, BBS                                        | 215 families - in 140 test performed                                           | both    | NR             | 57/215 (26.5%) | 100%          | NR                                               | NR | SNVs or CNVs                      | 4 or 5 genes for SNVs depending on genotype  | 73/140 (52.1%)  | 0%    |
| <p>MKS n=88, JS/JSRD n=61, BBS n=66</p> <p><i>Noteworthy: detection rate in consanguineous families 62%   yield impacted by: consanguinity, phenotype MKS</i></p>                                                                                                                                                                                                                                                                                                                                                                                                                                                                                                                      |                                                           |                                                                                |         |                |                |               |                                                  |    |                                   |                                              |                 |       |
| [Braun et al., 2016]                                                                                                                                                                                                                                                                                                                                                                                                                                                                                                                                                                                                                                                                   | suspected NPHP-RC based on renal ultrasound               | 79 families (103 individuals)                                                  | NR      | 19/79 (24.1%)  | 60/79 (75.9%)  | NR            | 0%                                               | NR | SNVs                              | exome wide - additional analysis of 90 genes | 50/79 (63.3%)   | NP    |
| <p><i>Noteworthy: suspicion of NPHP-RC based on renal ultrasound: chronically increased echogenicity, loss of cortico-medullary differentiation, and/or ≥2 renal cysts   in all families, a homozygous deletion in the NPHP1 gene had been excluded prior to study inclusion. Inclusion was based on suspicion of NPHP-RC, however 18/50 individuals (36%) harbored a mutation in a gene that causes a monogenic kidney disease different from NPHP-RC: 8/50 renal tubulopathies, 4/50 AS, 3/50 CAKUT, 2/50 ARPKD, 1/50 APECED   yield impacted by: consanguinity</i></p>                                                                                                              |                                                           |                                                                                |         |                |                |               |                                                  |    |                                   |                                              |                 |       |
| [Schueler et al., 2016]                                                                                                                                                                                                                                                                                                                                                                                                                                                                                                                                                                                                                                                                | NPHP-RC                                                   | 384 families                                                                   | NR      | 84/384 (21.9%) | 67/384 (17.4%) | NR            | NR                                               | NR | SNVs + CNVs                       | 34                                           | 81/384 (21.1%)  | 0%    |
| <p><i>Noteworthy: prior to study enrolment, individuals with homozygous deletions of NPHP1 were excluded by using a multiplex PCR-based deletion analysis.</i></p>                                                                                                                                                                                                                                                                                                                                                                                                                                                                                                                     |                                                           |                                                                                |         |                |                |               |                                                  |    |                                   |                                              |                 |       |
| [Al-Hamed et al., 2016]                                                                                                                                                                                                                                                                                                                                                                                                                                                                                                                                                                                                                                                                | Cystic, enlarged or echogenic kidneys on fetal ultrasound | 44 families                                                                    | fetuses | 26/44 (59.1%)  | 38/44 (86.4%)  | 38/44 (86.4%) | 0%                                               | NR | SNVs                              | 90                                           | 28/44 (63.6%)   | NP    |
| <p><i>Noteworthy: in group B, where DNA was available from both parents but not the affected child (10 families), homozygous mutations were inferred by finding identical heterozygous variants in both parents in seven cases, consistent with the known parental consanguinity   yield impacted by: consanguinity</i></p>                                                                                                                                                                                                                                                                                                                                                            |                                                           |                                                                                |         |                |                |               |                                                  |    |                                   |                                              |                 |       |
| [Lindstrand et al., 2016]                                                                                                                                                                                                                                                                                                                                                                                                                                                                                                                                                                                                                                                              | BBS                                                       | 92                                                                             | both    | NR             | NR             | NR            | NR                                               | NR | CNVs + SNVs in CNV positive cases | 94                                           | 17/92 (18.5%)   | 100%* |
| <p><i>Noteworthy: criteria for variant classification NR; 5 patients were compound heterozygotes for CNV+SNV</i></p>                                                                                                                                                                                                                                                                                                                                                                                                                                                                                                                                                                   |                                                           |                                                                                |         |                |                |               |                                                  |    |                                   |                                              |                 |       |

|                                                                                                                                                                                                                                                                                                                                                  |                                                                                                                                                                   |                                                                                               |           |               |               |                               |                                                              |               |             |                              |                                                                                                                                                               |                                              |
|--------------------------------------------------------------------------------------------------------------------------------------------------------------------------------------------------------------------------------------------------------------------------------------------------------------------------------------------------|-------------------------------------------------------------------------------------------------------------------------------------------------------------------|-----------------------------------------------------------------------------------------------|-----------|---------------|---------------|-------------------------------|--------------------------------------------------------------|---------------|-------------|------------------------------|---------------------------------------------------------------------------------------------------------------------------------------------------------------|----------------------------------------------|
| [Vilboux et al., 2017]                                                                                                                                                                                                                                                                                                                           | JS and related disorders                                                                                                                                          | 86 families (100 individuals)                                                                 | both      | NR            | 1/100 (1%)    | 100/100 (100%)                | 0%                                                           | NR            | SNVs        | 27 followed by WES           | 81/86 (94.1%)                                                                                                                                                 | NP                                           |
| <i>Noteworthy: in this article, for simplicity, "JS" includes Senior-Løken and COACH syndromes</i>                                                                                                                                                                                                                                               |                                                                                                                                                                   |                                                                                               |           |               |               |                               |                                                              |               |             |                              |                                                                                                                                                               |                                              |
| [Stokman et al., 2018]                                                                                                                                                                                                                                                                                                                           | (suspected) nephronophthisis related ciliopathy                                                                                                                   | 36 families (40 individuals) - current genetic testing performed in 12 families (13 patients) | both      | NR            | NR            | 22/40 (55.0%)                 | NR, mean 9 years (range isolated 5-26; range syndromic 5-33) | 24/40 (60.0%) | SNVs + CNVs | 15 or WES                    | 4/12 (33.3%) based on current testing<br><br>24/36 (66.7%) families     28/40 (67.5%) individuals including predetermined genetic diagnoses                   | 100% (in n=12)<br><br>54.2% in entire cohort |
| <i>Noteworthy: diagnosis already established in n=23 individuals, of which one was comp. het. with VUS   12 additional patients tested with ciliopathy and renal features that did not fulfill clinical criteria of NPH (yield in overall cohort: 39/52 (75%) individuals)</i>                                                                   |                                                                                                                                                                   |                                                                                               |           |               |               |                               |                                                              |               |             |                              |                                                                                                                                                               |                                              |
| [Szabó et al., 2018]                                                                                                                                                                                                                                                                                                                             | ARPKD                                                                                                                                                             | 36 families (37 individuals)                                                                  | NR        | NR            | 0%            | NR                            | 0%                                                           | 10/37 (27%)   | SNVs + CNVs | 4813                         | 35/36 (97.2%)                                                                                                                                                 | 22.9%                                        |
| <i>Noteworthy: no extra-renal and hepatic involvement suggestive of other ciliopathies was part of inclusion criteria   criteria for variant classification NR   phenocopies: PKD1, HNF1B, NPHP1, TMEM67, PKD1/TSC2</i>                                                                                                                          |                                                                                                                                                                   |                                                                                               |           |               |               |                               |                                                              |               |             |                              |                                                                                                                                                               |                                              |
| [Al Alawi et al., 2019]                                                                                                                                                                                                                                                                                                                          | presumed inherited cystic kidney disease<br><br>ADPKD n=16;<br>ARPKD n=16;<br>NPHP-RC n=12;<br>ciliopathy syndromes n=5;<br>unspecified cystic kidney disease n=4 | 53                                                                                            | both      | 39/53 (73.6%) | 11/53 (20.8%) | NR                            | NR, median age at study inclusion 10 years (range 0-63)      | 25/53 (47.2%) | SNVs + CNVs | 49                           | 39/53 (73.6%)<br><br>ADPKD 12/16 (75%); ARPKD 16/16 (100%); NPHP-RC 8/12 (66.7%); ciliopathy syndromes 1/5 (20%); unspecified cystic kidney disease 3/4 (75%) | 7.5%                                         |
| <i>Noteworthy: authors reported higher yield (75%), including 1 VUS in WRD19 which segregated with phenotype   Molecular genetic testing changed the diagnosis in 6% and revealed a diagnosis in 6% with unspecified cystic kidney disease   No difference in yield in pediatric versus adult patients   yield impacted by: phenotype: ARPKD</i> |                                                                                                                                                                   |                                                                                               |           |               |               |                               |                                                              |               |             |                              |                                                                                                                                                               |                                              |
| [Liang et al., 2020]                                                                                                                                                                                                                                                                                                                             | clinically suspected of cilia-related kidney disorders<br><br>both ADPKD and syndromal ciliopathies; % NR                                                         | 33 families (44 individuals)                                                                  | both      | 20/33 (60.6%) | NR            | 23/33 (69.7%)   26/44 (59.1%) | NR                                                           | 6/44 (13.6%)  | SNVs        | 88                           | 21/33 (63.6%)                                                                                                                                                 | NP                                           |
| [Obeidova et al., 2020]                                                                                                                                                                                                                                                                                                                          | cystic kidney diseases (ARPKD, ADPKD, NPHP,                                                                                                                       | 31                                                                                            | pediatric | 2/31 (6.5%)   | NR            | 23/31 (74.2%)                 | 0%, 15/31 neonatal (prenatal); 8/31                          | NR            | SNVs + CNVs | 118 or 153 (updated version) | 22/31 (71.0%)                                                                                                                                                 | 9.1%                                         |

RCAD syndrome,  
BBS)

ARPKD n=20; NPHP  
n=1; ADPKD (VEO)  
n=6; RCAD  
syndrome n=3;  
Bardet-Biedl  
syndrome n=1

ADPKD  
on  
ultrasound

infantile; 8/31  
childhood

*Noteworthy: clinically based diagnosis changed in 16% of patients*

|                                                                                                                                                                                 |       |                                      |           |                    |                  |                   |                                                        |                    |                |                                              |                 |       |
|---------------------------------------------------------------------------------------------------------------------------------------------------------------------------------|-------|--------------------------------------|-----------|--------------------|------------------|-------------------|--------------------------------------------------------|--------------------|----------------|----------------------------------------------|-----------------|-------|
| [Yue et al., 2020]                                                                                                                                                              | NPHP  | 48 families<br>(55<br>individuals)   | pediatric | NR                 | NR               | 23/48<br>(47.9%)  | 0%, median age<br>7 years (range 6<br>days - 17 years) | NR                 | SNVs +<br>CNVs | 63 +<br>additional<br>genes in<br>some cases | 19/48 (39.6%)   | 36.8% |
| [Al Alawi et al.,<br>2020]                                                                                                                                                      | ARPKD | 32 families<br>(40<br>individuals)   | pediatric | 24/32<br>(75.0%)   | 21/32<br>(65.6%) | 12/40<br>(30.0%)  | 0%                                                     | 12/40<br>(30.0%)   | SNVs           | 1 or 49                                      | 30/32 (93.8%)   | NP    |
| <i>Noteworthy: diagnosis already established in n=18 individuals which are included in yield for newly sequenced 22 patients only PKHD1 exons 3, 6, 32 and 58 were analyzed</i> |       |                                      |           |                    |                  |                   |                                                        |                    |                |                                              |                 |       |
| [Benson et al.,<br>2021]                                                                                                                                                        | PKD   | 148 families<br>(169<br>individuals) | adult     | 131/169<br>(77.5%) | NR               | 85/169<br>(50.3%) | NR, mean 36<br>years (4-79)                            | 114/169<br>(67.4%) | SNVs +<br>CNVs | 227 (n=14<br>only 11<br>genes)               | 100/148 (67.6%) | 3.0%  |

*Noteworthy: yield using Mayo Clinic pathogenicity guidelines = 120/148 (81.1%) | Cases with previous genetic diagnosis of PKD not included | yield impacted by: age at diagnosis*

**Supplementary Table 1d – summary of individual glomerulopathy studies.** Patient, cohort and test characteristics per study are presented. Diagnostic yield and percentage of diagnostic yield that is explained by CNVs are summarized. In grey font additional info on phenotypes, extrapolated cohort and diagnostic yield for both of these are presented if available. A summary of noteworthy details is presented per study, including patient characteristics that are expected to have positively impacted the diagnostic yield. Abbreviations are listed in Supplementary Table 2.

| glomerulopathies                                                                                                                                                                                                                                                                                                            | phenotype                                                                                  | n of population                                                                                                          | pediatric / adult at time of study | positive family history (n, %) | consang. (n, %)  | extra-renal features (n, %) | adult-onset disease (n, %) | ESKD (n, %)      | type of variants tested | n genes analyzed                                      | diagnostic yield (n, %)                                                  | percentage of yield explained by CNV (%) |
|-----------------------------------------------------------------------------------------------------------------------------------------------------------------------------------------------------------------------------------------------------------------------------------------------------------------------------|--------------------------------------------------------------------------------------------|--------------------------------------------------------------------------------------------------------------------------|------------------------------------|--------------------------------|------------------|-----------------------------|----------------------------|------------------|-------------------------|-------------------------------------------------------|--------------------------------------------------------------------------|------------------------------------------|
| <b>nephrotic syndrome</b>                                                                                                                                                                                                                                                                                                   |                                                                                            |                                                                                                                          |                                    |                                |                  |                             |                            |                  |                         |                                                       |                                                                          |                                          |
| [McCarthy et al., 2013]                                                                                                                                                                                                                                                                                                     | childhood SRNS                                                                             | 36                                                                                                                       | pediatric                          | 10/36 (27.8%)                  | NR               | NR                          | 0%                         | 12/36 (33.3%)    | SNVs                    | 446                                                   | 11/36 (30.6%)                                                            | NP                                       |
| <i>Noteworthy: reported yield based on 24/446 genes   yield impacted by: lower age of onset &amp; familial disease</i>                                                                                                                                                                                                      |                                                                                            |                                                                                                                          |                                    |                                |                  |                             |                            |                  |                         |                                                       |                                                                          |                                          |
| [Al-Hamed et al., 2013]                                                                                                                                                                                                                                                                                                     | CNS, infantile NS and childhood SRNS                                                       | 49 families (62 cases)                                                                                                   | both                               | 12/49 (24.5%)                  | 37/49 (75.5%)    | NR                          | 0%                         | 20/49 (40.8%)    | SNVs                    | 9                                                     | 25/49 (51.0%)                                                            | NP                                       |
| <i>Noteworthy: yield impacted by: family history, consanguinity</i>                                                                                                                                                                                                                                                         |                                                                                            |                                                                                                                          |                                    |                                |                  |                             |                            |                  |                         |                                                       |                                                                          |                                          |
| [Kari et al., 2013]                                                                                                                                                                                                                                                                                                         | children with SRNS >1 year with genetic testing performed where renal biopsy was performed | 44 (from cohort of 242 children with NS of which 214 age >1 year; including 150 SSNS; 64 SRNS (incl. 11 secondary SRNS)) | pediatric                          | NR                             | NR               | NR                          | 0%                         | NR               | SNVs                    | 3                                                     | 5/44 (11.4%)                                                             | NP                                       |
|                                                                                                                                                                                                                                                                                                                             |                                                                                            |                                                                                                                          |                                    |                                |                  |                             |                            |                  |                         |                                                       | 5/64 (7.8%) SRNS;<br>5/214 (2.3%) NS >1 year;<br>5/242 (2.0%) NS any age |                                          |
| <i>Noteworthy: children excluded with (a) an underlying, secondary cause for NS (such as lupus nephritis, infections, or neoplasm), (b) congenital and infantile NS, or (c) steroid-sensitive nephrotic syndrome (SSNS)   criteria for variant classification NR   yield impacted by: no response to immunosuppressives</i> |                                                                                            |                                                                                                                          |                                    |                                |                  |                             |                            |                  |                         |                                                       |                                                                          |                                          |
| [Giglio et al., 2015]                                                                                                                                                                                                                                                                                                       | sporadic, nonsyndromic, and non-congenital, nephrotic syndrome                             | 69                                                                                                                       | pediatric                          | 0%                             | 0%               | 0%                          | 0%                         | 12/69 (17.4%)    | SNVs                    | 46                                                    | 10/69 (14.5%)                                                            | NP                                       |
|                                                                                                                                                                                                                                                                                                                             |                                                                                            |                                                                                                                          |                                    |                                |                  |                             |                            |                  |                         |                                                       | SRNS 10/31 (32.3%);<br>SSNS 0/38 (0%)                                    |                                          |
| <i>Noteworthy: patients who exhibited extra-renal symptoms, had a familial history, or had a congenital onset were excluded   yield impacted by: lack of response to immunosuppressive agent</i>                                                                                                                            |                                                                                            |                                                                                                                          |                                    |                                |                  |                             |                            |                  |                         |                                                       |                                                                          |                                          |
| [Trautmann et al., 2015]                                                                                                                                                                                                                                                                                                    | SRNS; congenital NS; persistent subnephrotic proteinuria of likely genetic origin          | 1174 (from cohort of 1655)                                                                                               | both                               | 260/1014 (25.6%)               | 306/1070 (28.6%) | 287/1655 (17.3%)            | NR, all <20 years          | 422/1544 (27.3%) | SNVs                    | NR (1-31 mentioned; 14 genes with reported mutations) | 277/1174 (23.6%)                                                         | NR                                       |
|                                                                                                                                                                                                                                                                                                                             |                                                                                            |                                                                                                                          |                                    |                                |                  |                             |                            |                  |                         |                                                       | 277/1655 (16.7%) in entire cohort                                        |                                          |
|                                                                                                                                                                                                                                                                                                                             |                                                                                            |                                                                                                                          |                                    |                                |                  |                             |                            |                  |                         |                                                       | SRNS in first 5 years 64%;<br>congenital NS 6%                           |                                          |
| <i>Noteworthy: limited information provided for type of genetic test performed and number of genes tested   criteria for variant classification NR   yield impacted by: age of onset; lower post-transplant disease recurrence</i>                                                                                          |                                                                                            |                                                                                                                          |                                    |                                |                  |                             |                            |                  |                         |                                                       |                                                                          |                                          |

|                                                                                                                                                                                                                                                                                          |                                                                                                                                                      |                                  |                      |                |                  |                |                                 |                |             |                       |                  |    |
|------------------------------------------------------------------------------------------------------------------------------------------------------------------------------------------------------------------------------------------------------------------------------------------|------------------------------------------------------------------------------------------------------------------------------------------------------|----------------------------------|----------------------|----------------|------------------|----------------|---------------------------------|----------------|-------------|-----------------------|------------------|----|
| [Sadowski et al., 2015]                                                                                                                                                                                                                                                                  | SRNS                                                                                                                                                 | 1783 families (2016 individuals) | both                 | NR             | 372/1783 (20.9%) | NR             | NR, mean 3.4 years (0-63)       | NR             | SNVs        | 27                    | 526/1783 (29.5%) | NP |
| <i>Noteworthy: yield impacted by: lower age of onset &amp; consanguinity</i>                                                                                                                                                                                                             |                                                                                                                                                      |                                  |                      |                |                  |                |                                 |                |             |                       |                  |    |
| [Bierzynska et al., 2017]                                                                                                                                                                                                                                                                | primary SRNS, congenital and/or familial nephrotic syndrome (presumed SRNS), secondary SRNS, or FSGS on biopsy and syndromic proteinuric nephropathy | 187                              | pediatric            | 22/186 (11.8%) | 13/180 (7.2%)    | 43/187 (22.9%) | 0%                              | 69/187 (36.9%) | SNVs        | 53                    | 49/187 (26.2%)   | NP |
| <i>Noteworthy: yield impacted by: positive family history + CKD5</i>                                                                                                                                                                                                                     |                                                                                                                                                      |                                  |                      |                |                  |                |                                 |                |             |                       |                  |    |
| [Wang et al., 2017a]                                                                                                                                                                                                                                                                     | SRNS + isolated proteinuria                                                                                                                          | 120                              | pediatric            | 19/109 (17.4%) | NR               | NR             | 0%                              | 16/120 (13.3%) | SNVs + CNVs | 28                    | 34/120 (28.3%)   | 0% |
| SRNS n=110; isolated proteinuria n=10                                                                                                                                                                                                                                                    |                                                                                                                                                      |                                  |                      |                |                  |                |                                 |                |             |                       |                  |    |
| <i>Noteworthy: patients were excluded if their age at onset of disease was over 18 years or if they were diagnosed as having Alport syndrome   genetic testing results for pediatric SRNS patients vary with different ethnicities   yield impacted by: age of onset; family history</i> |                                                                                                                                                      |                                  |                      |                |                  |                |                                 |                |             |                       |                  |    |
| [Wang et al., 2017b]                                                                                                                                                                                                                                                                     | SRNS                                                                                                                                                 | 60                               | pediatric            | 0%             | 0%               | 0%             | 0%                              | 0%             | SNVs        | Sanger 5; NGS 17      | 19/60 (31.7%)    | NP |
| <i>Noteworthy: secondary nephrotic syndrome and those from consanguineous families were excluded   yield impacted by: lack of response to immunosuppressive agents</i>                                                                                                                   |                                                                                                                                                      |                                  |                      |                |                  |                |                                 |                |             |                       |                  |    |
| [Warejko et al., 2018]                                                                                                                                                                                                                                                                   | SRNS or nephrotic range proteinuria with histology of FSGS or diffuse sclerosis                                                                      | 300 families (335 individuals)   | both                 | 93/300 (31.0%) | 146/300 (49%)    | 91/335 (27.2%) | 8/335 (2.4%)                    | 5/300 (1.7%)   | SNVs        | 33 followed by WES    | 74/300 (24.7%)   | NP |
| <i>Noteworthy: in 11 families (3.7%) a mutation in a gene that causes a phenocopy of steroid-resistant nephrotic syndrome was detected   yield impacted by: consanguinity</i>                                                                                                            |                                                                                                                                                      |                                  |                      |                |                  |                |                                 |                |             |                       |                  |    |
| [Tan et al., 2018]                                                                                                                                                                                                                                                                       | consecutive cohort of SRNS or nephrotic range proteinuria with histology of FSGS or diffuse sclerosis                                                | 72 families (77 individuals)     | pediatric            | NR             | 8/72 (11.1%)     | NR             | NR, median 3.5 years (0.1-18.8) | NR             | SNVs        | 24                    | 8/72 (11.1%)     | NP |
| <i>Noteworthy: unknown if cases were excluded with previous diagnosis, it is unlikely that all consecutive patients were unsolved   yield impacted by: age of onset, consanguinity</i>                                                                                                   |                                                                                                                                                      |                                  |                      |                |                  |                |                                 |                |             |                       |                  |    |
| [Bezdička et al., 2018]                                                                                                                                                                                                                                                                  | SRNS                                                                                                                                                 | 70 families (74 individuals)     | Perinatal /pediatric | NR             | 1/70 (1.4%)      | 24/74 (32.4%)  | 0%                              | 28/74 (37.8%)  | SNVs        | tier 1: 3; tier 2: 48 | 25/70 (35.7%)    | NP |
| congenital NS n=11; infantile n=10; child-hood onset n=52                                                                                                                                                                                                                                |                                                                                                                                                      |                                  |                      |                |                  |                |                                 |                |             |                       |                  |    |
| <i>Noteworthy: two-tiered approach (first most frequent genes (NPHS2, WT1, NPHS1), second panel of 48 genes   yield impacted by: ESKD</i>                                                                                                                                                |                                                                                                                                                      |                                  |                      |                |                  |                |                                 |                |             |                       |                  |    |
| [Gribouval et al., 2018]                                                                                                                                                                                                                                                                 | non-syndromic, biopsy-proven FSGS or SRNS in the absence of known FH                                                                                 | 135                              | Adult                | 0%             | NR               | NR             | 100%                            | 67/135 (49.6%) | SNVs        | 35                    | 16/135 (11.9%)   | NP |

*Noteworthy: 14/135 (10.4%) presented with APOL1 high-risk alleles, we excluded these from the diagnostic yield and report this number here separately | paper concludes with molecular diagnosis in 30 patients (22.2%) based on pathogenic mutations in known monogenic SRNS genes and APOL1 high-risk alleles | yield impacted by: age of onset, ESRD*

|                        |                      |                                                                   |    |    |    |    |              |                |             |     |                                                          |      |
|------------------------|----------------------|-------------------------------------------------------------------|----|----|----|----|--------------|----------------|-------------|-----|----------------------------------------------------------|------|
| [Landini et al., 2020] | NS                   | 111                                                               | NR | 0% | NR | 0% | 5/111 (4.5%) | 30/111 (27.0%) | SNVs + CNVs | 298 | 37/111 (33.3%)                                           | 2.7% |
|                        | SRNS n=64; SSNS n=47 | (from consecutive cohort of 252 referred with nephrotic syndrome) |    |    |    |    |              |                |             |     | 37/252 (14.7%) in entire cohort (of which 141 were SSNS) |      |

*Noteworthy: patients excluded with known family history of nephrotic syndrome OR syndromic nephrotic syndrome / extra-renal involvement. Unknown if genetic testing was performed in patients with known family history (therefore not included in extrapolated yield) | reverse phenotyping of patients and family members led to diagnosis of phenocopies in 28% of cases | VUS includes LP/P variants that don't explain patient's phenotype (CUBN/SOX17) | yield impacted by: ESRD for monogenic podocytopathies*

|                       |                                       |     |      |                |    |                |               |    |             |    |                |    |
|-----------------------|---------------------------------------|-----|------|----------------|----|----------------|---------------|----|-------------|----|----------------|----|
| [Nagano et al., 2020] | congenital/infantile NS, SRNS or FSGS | 230 | both | 30/230 (13.0%) | NR | 27/230 (11.7%) | 10/230 (4.3%) | NR | SNVs + CNVs | 60 | 69/230 (30.0%) | 0% |
|-----------------------|---------------------------------------|-----|------|----------------|----|----------------|---------------|----|-------------|----|----------------|----|

*Noteworthy: remission of proteinuria in patients with unknown causative mutations was observed in 26% of patients with various immunosuppressive or renoprotective therapies, whereas only 5% of patients with monogenic disease-causing mutations exhibited complete remission | yield impacted by: age of patients*

#### other/mixed glomerulopathies

|                          |                          |                               |      |    |    |                |                                               |                |      |   |               |    |
|--------------------------|--------------------------|-------------------------------|------|----|----|----------------|-----------------------------------------------|----------------|------|---|---------------|----|
| [Fallerini et al., 2014] | clinical suspicion of AS | 87 families (271 individuals) | both | NR | NR | 49/176 (27.8%) | NR, median 36 years (range 1-82) at inclusion | 42/176 (23.8%) | SNVs | 3 | 48/87 (55.2%) | NP |
|--------------------------|--------------------------|-------------------------------|------|----|----|----------------|-----------------------------------------------|----------------|------|---|---------------|----|

*Noteworthy: inheritance: XL semidomant in 65%; AR in 4% and AD in 31%*

|                          |                                         |     |      |               |    |                     |                                 |                |             |   |                |      |
|--------------------------|-----------------------------------------|-----|------|---------------|----|---------------------|---------------------------------|----------------|-------------|---|----------------|------|
| [Morinière et al., 2014] | hematuric nephropathy                   | 101 | both | 77/96 (80.2%) | 0% | min. 47/101 (46.5%) | NR, mean 11 years (range <1-54) | 26/101 (25.7%) | SNVs + CNVs | 3 | 81/101 (80.2%) | 8.6% |
|                          | AS n=90; benign familial hematuria n=10 |     |      |               |    |                     |                                 |                |             |   |                |      |

|                           |                                      |    |       |    |    |    |    |    |             |   |               |      |
|---------------------------|--------------------------------------|----|-------|----|----|----|----|----|-------------|---|---------------|------|
| [Nabais Sá et al., 2015a] | AS (at least 1 diagnostic criterium) | 60 | Adult | NR | NR | NR | NR | NR | SNVs + CNVs | 1 | 22/60 (36.7%) | 4.5% |
|---------------------------|--------------------------------------|----|-------|----|----|----|----|----|-------------|---|---------------|------|

*Noteworthy: yield impacted by: number of AS criteria met*

|                           |         |    |       |    |             |    |    |    |      |   |               |    |
|---------------------------|---------|----|-------|----|-------------|----|----|----|------|---|---------------|----|
| [Nabais Sá et al., 2015b] | AS/TBMN | 40 | Adult | NR | 2/40 (5.0%) | NR | NR | NR | SNVs | 2 | 25/40 (62.5%) | NP |
|---------------------------|---------|----|-------|----|-------------|----|----|----|------|---|---------------|----|

*Noteworthy: probands diagnosed with AS/TBMN (at least one diagnostic criteria of AS), either with a family history suggestive of autosomal inheritance of kidney disease (n= 5) or without detectable pathogenic mutations in COL4A5 (n= 35) | yield impacted by: number of AS criteria met*

|                     |                     |                     |       |               |    |    |               |    |      |    |               |    |
|---------------------|---------------------|---------------------|-------|---------------|----|----|---------------|----|------|----|---------------|----|
| [Gast et al., 2016] | FSGS, SRNS          | 76 (81 individuals) | Adult | 24/76 (31.5%) | NR | NR | 70/81 (86.4%) | NR | SNVs | 39 | 15/76 (19.8%) | NP |
|                     | FSGS n=80; SRNS n=1 |                     |       |               |    |    |               |    |      |    |               |    |

*Noteworthy: patients with positive family history of renal disease were prioritized in recruitment. Only 1 patient with SRNS was included. | yield impacted by: positive family history and childhood onset*

|                   |                                                |     |      |    |    |    |                               |    |             |    |                |       |
|-------------------|------------------------------------------------|-----|------|----|----|----|-------------------------------|----|-------------|----|----------------|-------|
| [Bu et al., 2016] | patients screened with the Genetic Complement- | 193 | both | NR | NR | NR | 119/193 (61.7%) = current age | NR | SNVs + CNVs | 11 | 78/193 (40.4%) | 21.8% |
|-------------------|------------------------------------------------|-----|------|----|----|----|-------------------------------|----|-------------|----|----------------|-------|

**Mediated Renal Disease Panel**

TMA: aHUS n=118; TTP n=6; other TMA n=11; aHUS/TTP n=12 | C3G: C3GN n=30; DDD n=5; C3GN/DDD n=2 | other: untargeted diseases n=9, (SLE/IgAN/ARF/Acute GN)

C3GN&DDD 16/37 (43.2%); aHUS&TTP 56/136 (41.2%); other TMA 4/11 (36.4%); untargeted 2/9 (22.2%)

*Noteworthy: yield also includes VUS, data not provided for calculating yield based on LP+P | from 91 identified variants: 68 VUS; 11 P; 12 LP, yield based on LP+P is therefore expected to be much lower than the yield presented here | yield impacted by: phenotype C3G*

|                    |                                                                         |     |      |                |                |    |                |    |             |    |                                                       |      |
|--------------------|-------------------------------------------------------------------------|-----|------|----------------|----------------|----|----------------|----|-------------|----|-------------------------------------------------------|------|
| [Sen et al., 2017] | patients referred for gene panel testing of SRNS/collagen-related genes | 302 | both | 58/183 (31.7%) | 17/141 (12.1%) | NR | 62/302 (20.5%) | NR | SNVs + CNVs | 37 | 71/302 (23.5%)                                        | 2.8% |
|                    | SRNS n=255, SSNS n=12, hematuria/AS n=35                                |     |      |                |                |    |                |    |             |    | SRNS 54/255 (21.2%); SSNS 0.12 (0%); AS 17/35 (48.6%) |      |

*Noteworthy: yield impacted by: age of onset, phenotype SRNS*

|                    |      |                                |       |                |    |    |                 |                |             |     |                |      |
|--------------------|------|--------------------------------|-------|----------------|----|----|-----------------|----------------|-------------|-----|----------------|------|
| [Yao et al., 2019] | FSGS | 179 families (193 individuals) | Adult | 43/193 (22.3%) | NR | NR | 135/161 (83.9%) | 72/147 (49.0%) | SNVs + CNVs | 109 | 37/179 (20.1%) | 2.7% |
|--------------------|------|--------------------------------|-------|----------------|----|----|-----------------|----------------|-------------|-----|----------------|------|

*Noteworthy: additional category of possible pathogenic added by authors, not included in diagnostic yield reported in this table, likely pathogenic is included in table | yield impacted by: positive family history*

|                         |                                                             |                                |    |    |                |    |                       |    |      |    |                                                                         |    |
|-------------------------|-------------------------------------------------------------|--------------------------------|----|----|----------------|----|-----------------------|----|------|----|-------------------------------------------------------------------------|----|
| [Schapiro et al., 2019] | onset of both proteinuria and hematuria before age 25 years | 362 families (371 individuals) | NR | NR | 56/362 (15.5%) | NR | NR, all before age 25 | NR | SNVs | 34 | 51/362 (14.1%)                                                          | NP |
|                         |                                                             |                                |    |    |                |    |                       |    |      |    | AS 17/362 (4.7%); aHUS 5/362 (1.4%); TTP 0/362 (0%); SRNS 29/362 (8.0%) |    |

*Noteworthy: 11 genes screened in all families and 23 genes in families not previously screened for monogenic forms of SRNS | yield impacted by: consanguinity*

|                         |                                             |     |    |    |    |    |    |    |             |                    |                 |      |
|-------------------------|---------------------------------------------|-----|----|----|----|----|----|----|-------------|--------------------|-----------------|------|
| [Yamamura et al., 2019] | suspected AS referred for genetic diagnosis | 441 | NR | NR | NR | NR | NR | NR | SNVs + CNVs | NGS: 45; sanger: 3 | 397/441 (90.0%) | 5.0% |
|-------------------------|---------------------------------------------|-----|----|----|----|----|----|----|-------------|--------------------|-----------------|------|

*Noteworthy: 4 patients had pathogenic mutations in NPHS1, EYA1, LAMB2, AND CLCN5*

|                        |                                                       |     |           |    |    |    |    |    |      |    |                                             |    |
|------------------------|-------------------------------------------------------|-----|-----------|----|----|----|----|----|------|----|---------------------------------------------|----|
| [Ozdemir et al., 2020] | patients with glomerular proteinuria and/or hematuria | 320 | pediatric | NR | NR | NR | 0% | NR | SNVs | 47 | 87/320 (27.2%) had COL4A mutations, rest NR | NP |
|------------------------|-------------------------------------------------------|-----|-----------|----|----|----|----|----|------|----|---------------------------------------------|----|

*Noteworthy: only yield for COL4A mutations is reported | criteria for variant classification NR*

**Supplementary Table 1e – summary of individual nephrolithiasis/urolithiasis studies.** Patient, cohort and test characteristics per study are presented. Diagnostic yield and percentage of diagnostic yield that is explained by CNVs are summarized. In grey font additional info on phenotypes, extrapolated cohort and diagnostic yield for both of these are presented if available. A summary of noteworthy details is presented per study, including patient characteristics that are expected to have positively impacted the diagnostic yield. Abbreviations are listed in Supplementary Table 2.

| nephrolithiasis / urolithiasis                                                                                                                                                                                                                                                                                                                                                                                                                                                           | phenotype                                                                 | n of population                                                                                      | pediatric / adult at time of study | positive family history (n, %) | consang. (n, %) | extra-renal features (n, %) | adult-onset disease (n, %)                                                                                             | ESKD (n, %) | type of variants tested | n genes analyzed                         | diagnostic yield (n, %)                                                                                                 | percentage of yield explained by CNV (%) |
|------------------------------------------------------------------------------------------------------------------------------------------------------------------------------------------------------------------------------------------------------------------------------------------------------------------------------------------------------------------------------------------------------------------------------------------------------------------------------------------|---------------------------------------------------------------------------|------------------------------------------------------------------------------------------------------|------------------------------------|--------------------------------|-----------------|-----------------------------|------------------------------------------------------------------------------------------------------------------------|-------------|-------------------------|------------------------------------------|-------------------------------------------------------------------------------------------------------------------------|------------------------------------------|
| [Daga et al., 2018]                                                                                                                                                                                                                                                                                                                                                                                                                                                                      | nephrolithiasis / nephrocalcinosis before age 25                          | 51 families (65 individuals)                                                                         | both                               | 29/51 (56.9%)                  | 8/51 (15.7%)    | NR                          | NR, all before <25 years, median age of onset with monogenic cause 3 years; median age without monogenic cause 7 years | NR          | SNVs                    | 30, followed by 117 in unsolved families | 16/51 (31.4%)                                                                                                           | NP                                       |
| <i>Noteworthy: in nine of 15 families, the genetic diagnosis may have specific implications for stone management and prevention   yield impacted by: age of onset, positive family history, consanguinity</i>                                                                                                                                                                                                                                                                            |                                                                           |                                                                                                      |                                    |                                |                 |                             |                                                                                                                        |             |                         |                                          |                                                                                                                         |                                          |
| [Amar et al., 2019]                                                                                                                                                                                                                                                                                                                                                                                                                                                                      | nephrolithiasis confirmed by abdominal ultrasound (hospitalized patients) | 235 families (440 individuals: 235 proband; 115 affected family members)<br><br>(from cohort of 159) | both                               | 109/229 (47.6%)                | 122/229 (53.3%) | NR                          | 155/229 (67.7%) onset >20 years                                                                                        | NR          | SNVs                    | 30                                       | 17/235 (7.2%)<br><br>17/259 (6.6%) in entire cohort (10 no consent; 7 evident secondary cause; 7 inadequate DNA sample) | NP                                       |
| <i>Noteworthy: 49% of probands reported a history of recurrent stones   yield impacted by: family history, age of onset</i>                                                                                                                                                                                                                                                                                                                                                              |                                                                           |                                                                                                      |                                    |                                |                 |                             |                                                                                                                        |             |                         |                                          |                                                                                                                         |                                          |
| [Ziyadov et al., 2021]                                                                                                                                                                                                                                                                                                                                                                                                                                                                   | patients that underwent surgery for urinary tract stone disease           | 48                                                                                                   | pediatric                          | 28/48 (58.3%)                  | NR              | NR                          | 0%                                                                                                                     | NR          | SNVs                    | 30                                       | 18/48 (37.5%)                                                                                                           | NP                                       |
| <i>Noteworthy: children with known metabolic disease were excluded   Clinical significance of 6/18 detected variants were unknown, however not reported in how many patients this was present, therefore yield includes also variants of unknown significance. However, article also reports: 18 variants with known clinical significance were detected in 16 of 46 patient; in the remaining two patients, genetic changes were detected in more than one gene; therefore unclear.</i> |                                                                           |                                                                                                      |                                    |                                |                 |                             |                                                                                                                        |             |                         |                                          |                                                                                                                         |                                          |
| [Zhao et al., 2021]                                                                                                                                                                                                                                                                                                                                                                                                                                                                      | urolithiasis referred for genetic testing                                 | 104 families (105 individuals)<br><br>(from cohort of 199 that received urolithiasis treatment)      | pediatric                          | NR                             | 2/105 (1.9%)    | NR                          | 0%                                                                                                                     | NR          | SNVs                    | 34                                       | 38/105 (36.2%)<br><br>38/199 (19.1%) in entire cohort                                                                   | NP                                       |
| <i>Noteworthy: high conformity (100%) was obtained between the molecular diagnoses and metabolic evaluation   94 patients refused genetic testing</i>                                                                                                                                                                                                                                                                                                                                    |                                                                           |                                                                                                      |                                    |                                |                 |                             |                                                                                                                        |             |                         |                                          |                                                                                                                         |                                          |



**Supplementary Table 1f – summary of individual tubulopathy studies.** Patient, cohort and test characteristics per study are presented. Diagnostic yield and percentage of diagnostic yield that is explained by CNVs are summarized. In grey font additional info on phenotypes, extrapolated cohort and diagnostic yield for both of these are presented if available. A summary of noteworthy details is presented per study, including patient characteristics that are expected to have positively impacted the diagnostic yield. Abbreviations are listed in Supplementary Table 2.

| tubulopathies                                                                                                                                                                                        | phenotype                                                       | n of population                | pediatric / adult at time of study | positive family history (n, %) | consang. (n, %) | extra-renal features (n, %) | adult-onset disease (n, %) | ESKD (n, %) | type of variants tested | n genes analyzed | diagnostic yield (n, %) | percentage of yield explained by CNV (%) |
|------------------------------------------------------------------------------------------------------------------------------------------------------------------------------------------------------|-----------------------------------------------------------------|--------------------------------|------------------------------------|--------------------------------|-----------------|-----------------------------|----------------------------|-------------|-------------------------|------------------|-------------------------|------------------------------------------|
| [Palazzo et al., 2017]                                                                                                                                                                               | dRTA referred for molecular diagnosis                           | 89                             | both                               | NR                             | 4/89 (4.5%)     | 69/89 (77.5%)               | 8/89 (9.0%)                | NR          | SNVs                    | 3                | 64/89 (71.9%)           | NP                                       |
| <i>Noteworthy: yield impacted by: age of onset, extra-renal features</i>                                                                                                                             |                                                                 |                                |                                    |                                |                 |                             |                            |             |                         |                  |                         |                                          |
| [Ashton et al., 2018]                                                                                                                                                                                | clinical diagnosis of tubulopathy                               | 384 families (410 individuals) | pediatric                          | NR                             | NR              | NR                          | 0%                         | NR          | SNVs + CNVs             | 37               | 245/384 (63.8%)         | NR                                       |
| <i>Noteworthy: genetic testing changed the clinical diagnosis in 16 cases and provided insights into the phenotypic spectrum of the respective disorders   %CNV determined by ExomeDepth unclear</i> |                                                                 |                                |                                    |                                |                 |                             |                            |             |                         |                  |                         |                                          |
| [Adalat et al., 2019]                                                                                                                                                                                | patients with chronic kidney disease stage 1-3 tested for HNF1B | 199                            | pediatric                          | NR                             | NR              | NR                          | 0%                         | NR          | SNVs + CNVs             | 1                | 52/199 (26.1%)          | 63.5%                                    |
| <i>Noteworthy: limited information provided for type of genetic test performed   yield impacted by: absence of hypomagnesemia</i>                                                                    |                                                                 |                                |                                    |                                |                 |                             |                            |             |                         |                  |                         |                                          |
| [Hureau et al., 2019]                                                                                                                                                                                | clinical diagnosis of tubular dysfunction                       | 1033                           | adult                              | NR                             | NR              | NR                          | 100%                       | NR          | SNVs + CNVs             | 46               | 269/1033 (26.0%)        | 0%                                       |
| <i>Noteworthy: a total of 16 patients (2.1%) had their initial clinical diagnosis revised by the panel analysis   yield impacted by: childhood onset</i>                                             |                                                                 |                                |                                    |                                |                 |                             |                            |             |                         |                  |                         |                                          |
| [Mori et al., 2021]                                                                                                                                                                                  | clinical diagnosis of GS                                        | 70                             | adult                              | NR                             | NR              | NR                          | 100%                       | NR          | SNVs + CNVs             | 168              | 30/70 (42.9%)           | 0%                                       |
| <i>Noteworthy: yield impacted by: age of diagnosis</i>                                                                                                                                               |                                                                 |                                |                                    |                                |                 |                             |                            |             |                         |                  |                         |                                          |

**Supplementary Table 1g – summary of individual ESKD studies.** Patient, cohort and test characteristics per study are presented. Diagnostic yield and percentage of diagnostic yield that is explained by CNVs are summarized. In grey font additional info on phenotypes, extrapolated cohort and diagnostic yield for both of these are presented if available. A summary of noteworthy details is presented per study, including patient characteristics that are expected to have positively impacted the diagnostic yield. Abbreviations are listed in Supplementary Table 2.

| ESKD                                                                                                                                                                                                                                                                                                                                                                                                                                                      | phenotype                                                                           | n of population                                               | pediatric / adult at time of study | positive family history (n, %) | consang. (n, %) | extra-renal features (n, %) | adult-onset disease (n, %)                        | ESKD (n, %) | type of variants tested | n genes analyzed | diagnostic yield (n, %)                                                                                                                                                    | percentage of yield explained by CNV (%) |
|-----------------------------------------------------------------------------------------------------------------------------------------------------------------------------------------------------------------------------------------------------------------------------------------------------------------------------------------------------------------------------------------------------------------------------------------------------------|-------------------------------------------------------------------------------------|---------------------------------------------------------------|------------------------------------|--------------------------------|-----------------|-----------------------------|---------------------------------------------------|-------------|-------------------------|------------------|----------------------------------------------------------------------------------------------------------------------------------------------------------------------------|------------------------------------------|
| [Snoek et al., 2018]                                                                                                                                                                                                                                                                                                                                                                                                                                      | adult-onset ESRD                                                                    | 5606                                                          | adult                              | NR                             | NR              | NR                          | NR, mean 30 years for ESRD onset (18-61)          | 100%        | CNVs                    | 20               | 26/5606 (0.5%)                                                                                                                                                             | 100%                                     |
| <i>Noteworthy: only 12% of the patients with homozygous NPHP1 full gene deletion were clinically diagnosed as having NPH   Prevalence of homozygous NPHP1 deletions was 0.9% in recipients between 18 and 50 years old at the start of first RRT (24/2794) and even higher (2.1%) in recipients ages 18–29 years old   yield impacted by: age onset ESRD</i>                                                                                              |                                                                                     |                                                               |                                    |                                |                 |                             |                                                   |             |                         |                  |                                                                                                                                                                            |                                          |
| [Mann et al., 2019]                                                                                                                                                                                                                                                                                                                                                                                                                                       | kidney transplant recipient <25 years old                                           | 104<br>(from cohort of 272)                                   | both                               | 23/104 (22.1%)                 | 9/104 (8.7%)    | 55/104 (52.9%)              | 0%                                                | 100%        | SNVs + CNVs             | 396              | 34/104 (32.7%)<br>34/272 (12.5%) from kidney transplant recipients <25 year                                                                                                | 14.7%                                    |
| urinary stone disease n=3; renal cystic ciliopathies n=9; SRNS n=21, CAKUT n=55, chronic glomerulonephritis n=7; unknown etiology ESRD n=9<br>urinary stone disease 3/3 (100%), renal cystic ciliopathies 7/9 (77.8%), SRNS 9/21 (42.9%), CAKUT 10/55 (18.2%), chronic glomerulonephritis 1/7 (14.3%), unknown etiology ESRD 4/9 (44.4%)                                                                                                                  |                                                                                     |                                                               |                                    |                                |                 |                             |                                                   |             |                         |                  |                                                                                                                                                                            |                                          |
| <i>Noteworthy: for probands in whom clinical SNP arrays revealed a pathogenic CNV and WES evaluation for SNVs and small insertions/deletions was negative, CNV analysis on WES data was performed using CoNIFER software in order to verify the clinical findings. WES was not utilized to identify novel CNVs because of the relatively low sensitivity of this technique   yield impacted by: consanguinity + extra-renal features + family history</i> |                                                                                     |                                                               |                                    |                                |                 |                             |                                                   |             |                         |                  |                                                                                                                                                                            |                                          |
| [Ottlewski et al., 2019]                                                                                                                                                                                                                                                                                                                                                                                                                                  | waitlisted for KTx with undetermined ESRD                                           | 50<br>(from cohort of 142; of which 57 had undetermined ESRD) | adult                              | NR                             | NR              | NR                          | NR, median age at first ESRD/RRT 43.4 (15.4-66.5) | 100%        | SNVs + CNVs             | 209              | 6/50 (12.0%) in undetermined ESRD<br>35/142 (24.6%) - in entire cohort of waitlisted patients<br>AS n=2; FSGS n=4 (in predetermined hereditary ADPKD n=24; COL4-NP/AS n=5) | 0%                                       |
| <i>Noteworthy: part of larger adult KTx waitlisted cohort with 29/142 (20.4%) patients with predetermined genetic disease</i>                                                                                                                                                                                                                                                                                                                             |                                                                                     |                                                               |                                    |                                |                 |                             |                                                   |             |                         |                  |                                                                                                                                                                            |                                          |
| [Schrezenmeier et al., 2021]                                                                                                                                                                                                                                                                                                                                                                                                                              | waitlisted for KTx with undetermined KF <40 year or biopsy suggestive for FSGS/aHUS | 126<br>(from cohort of 635; unknown origin in 137)            | adult                              | NR                             | NR              | NR                          | 100% KF onset >18 years                           | 100%        | SNVs + CNVs             | 600              | 14/126 (11.1%)<br>133/635 (20.9%) in entire KTx waitlisted cohort                                                                                                          | 7.1%                                     |

ESRD<40 n=87 (11 no consent); FSGS n=29; aHUS suspicion n=21

undetermined ESRD<40 10/86 (11.6%); FSGS 3/29 (10.3%); aHUS suspicion 1/21 (4.8%)

*Noteworthy: part of larger KTx waitlisted cohort of KF >18 years with 119/635 (18.7%) patients with predetermined genetic disease. ADPKD in 104/635 (16.4%)*

|                      |                                                                                                                                                                       |                                                    |       |    |    |    |                                |                      |             |     |                |                                                                                                                                                                                                                                       |                                                   |
|----------------------|-----------------------------------------------------------------------------------------------------------------------------------------------------------------------|----------------------------------------------------|-------|----|----|----|--------------------------------|----------------------|-------------|-----|----------------|---------------------------------------------------------------------------------------------------------------------------------------------------------------------------------------------------------------------------------------|---------------------------------------------------|
| [Snoek et al., 2022] | kidney transplant recipient <50 year due to ESKD of any cause (clear-cut non-genetic disease excluded)                                                                | 110<br><br>(from cohort of 273 transplant patient) | adult | NR | NR | NR | NR, mean 23 years (range 0-47) | 100% (before age 50) | SNVs + CNVs | 379 | 56/110 (50.9%) | 56/273 (20.5%) in entire transplant cohort                                                                                                                                                                                            | 5.4% detected prior to study, ExomeDepth yield 0% |
|                      | ciliopathy n=22; glomerular disease n=42; CAKUT n=13; TSC n=4; renal carcinoma n=3; vascular disease n=8; tubular disease n=2; CKD with unknown cause n=4; other n=12 |                                                    |       |    |    |    |                                |                      |             |     |                | ciliopathy 22/22 (100%); glomerular disease 19/42 (45.2%); CAKUT 1/13 (7.7%); TSC 4/4 (100%); renal carcinoma 3/3 (100%); vascular disease 0/8 (0%); tubular disease 2/2 (100%); CKD with unknown cause 1/4 (25%); other 4/12 (33.3%) |                                                   |

*Noteworthy: reclassification original diagnosis in 6% of cohort and in 11% of cases with genetic diagnosis | Extrapolated to the 273 patient cohort who did not all fit the inclusion criteria: diagnostic yield still 21% | Excluding cases with childhood-onset with mutation identified: min. yield 33/250 (13.2%) in adult-onset cohort.*

---

**Supplementary Table 1h – summary of individual mixed phenotype studies.** Patient, cohort and test characteristics per study are presented. Diagnostic yield and percentage of diagnostic yield that is explained by CNVs are summarized. In grey font additional info on phenotypes, extrapolated cohort and diagnostic yield for both of these are presented if available. A summary of noteworthy details is presented per study, including patient characteristics that are expected to have positively impacted the diagnostic yield. Abbreviations are listed in Supplementary Table 2.

| mixed kidney disease phenotypes                                                                                                                            | phenotype                                                                                                                                                                                                                                                                                           | n of population                                                                                    | pediatric / adult at time of study | positive family history (n, %)                              | consang. (n, %) | extra-renal features (n, %) | adult-onset disease (n, %)                                          | ESKD (n, %)   | type of variants tested | n genes analyzed               | diagnostic yield (n, %)                                                                                                                                                                                                                                                  | percentage of yield explained by CNV (%) |
|------------------------------------------------------------------------------------------------------------------------------------------------------------|-----------------------------------------------------------------------------------------------------------------------------------------------------------------------------------------------------------------------------------------------------------------------------------------------------|----------------------------------------------------------------------------------------------------|------------------------------------|-------------------------------------------------------------|-----------------|-----------------------------|---------------------------------------------------------------------|---------------|-------------------------|--------------------------------|--------------------------------------------------------------------------------------------------------------------------------------------------------------------------------------------------------------------------------------------------------------------------|------------------------------------------|
| [Alkanderi et al., 2017]                                                                                                                                   | patients attending a multidisciplinary renal genetics clinic in a tertiary center<br><br>familial hematuria n=30; cystic kidney disease n=25; CAKUT n=7; tubulopathy n=7; ciliopathy n=4; TSC n=3; congenital NS n=2; early-onset hypertension n=2; of which known molecular genetic diagnosis n=18 | 80 probands (244 individuals) of which 18 had previous genetic diagnosis                           | both                               | NR                                                          | 2/80 (2.5%)     | min. 25/80 (31.3%)          | NR, mean 19 years at referral; 30/80 (37.5%) <18 at clinical review | NR            | NR                      | 1 to multiple ("small panels") | 25/62 (40.3%)<br><br>43/80 (53.8%) - including known molecular genetic diagnosis referred for counseling<br><br>familial hematuria n=15; cystic kidney disease n=4; CAKUT n=1; tubulopathy n=2; ciliopathy n=2; TSC n=0; congenital NS n=1; early-onset hypertension n=0 | NR                                       |
| <i>Noteworthy: authors reported higher yield (42%), including 1 VUS in COL4A5 which segregated with phenotype   criteria for variant classification NR</i> |                                                                                                                                                                                                                                                                                                     |                                                                                                    |                                    |                                                             |                 |                             |                                                                     |               |                         |                                |                                                                                                                                                                                                                                                                          |                                          |
| [Mallett et al., 2017]                                                                                                                                     | clinical diagnoses of inherited kidney disease - referred for diagnostic genetic sequencing<br><br>AS/TBMN n=27; aHUS-C3GN n=33; ADTK n=4; ARPKD n=1; BBS n=1; CAKUT n=13; cystinosis n=1; NPHP-RD n=17; NS n=28; tubular disorders n=10                                                            | 135 families (140 individuals)                                                                     | both                               | NR                                                          | NR              | NR                          | NR, mean 19.3 years (range 0-71.3) at time of genetic testing       | NR            | SNVs + CNVs             | 207                            | 58/135 (43.0%)<br><br>ADTKD 1/4 (25.0%); aHUS 10/33 (30.3%), ARPKD 0/1 (0%); AS 22/27 (81.5%); BBS 1/1 (100%); CAKUT 1/13 (7.7%); cystinosis 1/1 (100%); NS 9/28 (32.1%); NPHP-RD 5/17 (29.4%); tubular disorders 8/10 (80.0%)                                           | 8.6%                                     |
| <i>Noteworthy: diagnostic rate same in adults and children   yield impacted by: genepanels: AS; tubular disorders</i>                                      |                                                                                                                                                                                                                                                                                                     |                                                                                                    |                                    |                                                             |                 |                             |                                                                     |               |                         |                                |                                                                                                                                                                                                                                                                          |                                          |
| [Lata et al., 2018]                                                                                                                                        | CKD of unknown cause or familial nephropathy of unclear cause or CKD with a clinical diagnosis compatible with a Mendelian genetic disease<br><br>glomerular disease n=50; tubulointerstitial disease n=10; developmental disorders n=11; hypertension n=5; undiagnosed disease/other n=16          | 92<br><br>(81 from 344 patient seen at outpatient nephrology clinics + 11 from other institutions) | adult                              | 53/92 (57.6%);<br><br>in out-patient cohort 106/344 (30.8%) | NR              | 0%                          | NR, mean 42 years (SD 17 years)                                     | 20/92 (21.7%) | SNVs                    | 287 followed by WES            | 22/92 (23.9%)<br><br>22/344 (6.4%) for entire cohort<br><br>CKD of unknown cause 9/16 (56.3%)                                                                                                                                                                            | NP                                       |

*Noteworthy: since PKD1 is not well-captured by WES, patient fulfilling clinical diagnostic criteria for ADPKD were not included*

|                        |                                                                                                                                               |     |      |     |    |    |                 |    |             |     |                                                                            |       |
|------------------------|-----------------------------------------------------------------------------------------------------------------------------------------------|-----|------|-----|----|----|-----------------|----|-------------|-----|----------------------------------------------------------------------------|-------|
| [Bullich et al., 2018] | suspected cystic/glomerular inherited kidney disease referred for genetic testing<br><br>suspected cystic n=207;<br>suspected glomerular n=98 | 305 | both | 44% | NR | NR | 155/305 (50.8%) | NR | SNVs + CNVs | 140 | 222/305 (72.8%)<br><br>Cystic 161/207 (77.8%);<br>glomerular 61/98 (62.2%) | 10.4% |
|------------------------|-----------------------------------------------------------------------------------------------------------------------------------------------|-----|------|-----|----|----|-----------------|----|-------------|-----|----------------------------------------------------------------------------|-------|

*Noteworthy: of genetically diagnosed patients, 15% were referred with an unspecified clinical diagnosis and in 2% genetic testing changed the clinical diagnosis. Therefore, in 17% of cases genetic analysis was crucial to establish the correct diagnosis | yield impacted by: adult-onset (likely explained by high percentage of clinical diagnoses of AS)*

|                         |                                                                                                                                                                                                                                                                                                                                                                                                                                               |                                                     |              |                                                   |    |    |                                                                                                                                                                      |                                                                                         |      |                                                                     |                                                                                                                                                                                                                                                                                                                                                                                         |    |
|-------------------------|-----------------------------------------------------------------------------------------------------------------------------------------------------------------------------------------------------------------------------------------------------------------------------------------------------------------------------------------------------------------------------------------------------------------------------------------------|-----------------------------------------------------|--------------|---------------------------------------------------|----|----|----------------------------------------------------------------------------------------------------------------------------------------------------------------------|-----------------------------------------------------------------------------------------|------|---------------------------------------------------------------------|-----------------------------------------------------------------------------------------------------------------------------------------------------------------------------------------------------------------------------------------------------------------------------------------------------------------------------------------------------------------------------------------|----|
| [Groopman et al., 2019] | Two subcohorts of CKD<br><br>subcohort 1: ESRD 50-80 years;<br>subcohort 2: genetic and research biobanking study with the aim of elucidating genetic basis of CKD - all patients with clinical diagnosis of CKD eligible<br><br>congenital/cystic renal disease n=531; glomerulopathy n=1411; diabetic nephropathy n=370; hypertensive nephropathy n=319; tubulointerstitial disease n=244; other n=159; nephropathy of unknown origin n=281 | 3315<br><br>subcohort 1: 1128;<br>subcohort 2: 2187 | mostly adult | subcohort 1: NR;<br>subcohort 2: 619/2187 (28.3%) | NR | NR | 3037/3315 (91.6%) >21 years at time of study entry<br><br>subcohort 1: 100% >45 years at time of study entry;<br>subcohort 2: 87.3% >21 years at time of study entry | 2144/315 (64.7%)<br><br>subcohort 1: 1128/128 (100%);<br>subcohort 2: 1016/2187 (46.5%) | SNVs | 625 kidney disease genes + other mendelian disease associated genes | 307/3315 (9.3%)<br><br>subcohort 1: 140/1128 (12.4%);<br>subcohort 2: 167/2187 (7.6%)<br><br>congenital or cystic renal disease 127/531 (23.9%);<br>glomerulopathy 101/1411 (7.2%);<br>diabetic nephropathy 6/370 (1.6%);<br>hypertensive nephropathy 8/319 (2.5%);<br>tubulointerstitial disease 11/244 (4.5%);<br>other 6/159 (3.8%);<br>nephropathy of unknown origin 48/281 (17.1%) | NP |
|-------------------------|-----------------------------------------------------------------------------------------------------------------------------------------------------------------------------------------------------------------------------------------------------------------------------------------------------------------------------------------------------------------------------------------------------------------------------------------------|-----------------------------------------------------|--------------|---------------------------------------------------|----|----|----------------------------------------------------------------------------------------------------------------------------------------------------------------------|-----------------------------------------------------------------------------------------|------|---------------------------------------------------------------------|-----------------------------------------------------------------------------------------------------------------------------------------------------------------------------------------------------------------------------------------------------------------------------------------------------------------------------------------------------------------------------------------|----|

*Noteworthy: in the majority of these patients (122 of 167 [73%]), the genetic diagnosis gave new clinical insight. In 18 patients the genetic findings reclassified the disease. In 39 patients with unknown origin of disease a molecular cause was established. In 88 the genetic diagnosis could initiate referral and evaluation for previously unrecognized extra-renal features of the associated diseases. For 84 patients the genetic diagnosis could inform therapy | Difference in yield between cohorts explained by number of ADPKD cases in subcohort 1 | yield impacted by: family history, diagnosis of congenital/cystic disease, nephropathy of unknown origin*

|                             |                                                                                                                                                                                                                                                                                                                                 |                                                                  |       |                |    |                |                |                |      |     |                                                                                                                                                                                                                                                                                                                                                                           |    |
|-----------------------------|---------------------------------------------------------------------------------------------------------------------------------------------------------------------------------------------------------------------------------------------------------------------------------------------------------------------------------|------------------------------------------------------------------|-------|----------------|----|----------------|----------------|----------------|------|-----|---------------------------------------------------------------------------------------------------------------------------------------------------------------------------------------------------------------------------------------------------------------------------------------------------------------------------------------------------------------------------|----|
| [Connaughto n et al., 2019] | enrolled adult patients with CKD presenting to nephrology (mostly familial or with extra-renal features) - selection of consecutive cohort IKGP<br><br>cystic kidney / renal ciliopathies n=12; CAKUT n=45; glomerular n=7; tubulointerstitial kidney disease n=7; SRNS n=7; renal tubulopathies n=2; CKD unknown etiology n=34 | 114 families (138 individuals)<br><br>(from IKGP cohort of 1840) | adult | 78/114 (68.4%) | NR | 16/114 (14.0%) | 85/138 (61.6%) | 90/138 (65.2%) | SNVs | 478 | 42/114 (36.8%)<br><br>min. 195/629 (31.0%) in cohort with positive family history - 206/1840 (11.2%) of consecutive IKGP cohort<br><br>cystic kidney / renal ciliopathies 10/12 (83.3%); CAKUT 10/45 (22.2%); glomerular 2/7 (28.6%); tubulointerstitial kidney disease 2/7 (28.6%); SRNS 0/7 (0%); renal tubulopathies 2/2 (100%); CKD of unknown etiology 16/34 (47.1%) | NP |
|-----------------------------|---------------------------------------------------------------------------------------------------------------------------------------------------------------------------------------------------------------------------------------------------------------------------------------------------------------------------------|------------------------------------------------------------------|-------|----------------|----|----------------|----------------|----------------|------|-----|---------------------------------------------------------------------------------------------------------------------------------------------------------------------------------------------------------------------------------------------------------------------------------------------------------------------------------------------------------------------------|----|

*Noteworthy: in 9 of 42 families (22%) the molecular genetic diagnosis resulted in correction of the clinical diagnosis, whereas in 16 families with CKD of unknown origin (38%), WES established a new molecular genetic diagnosis | Patients with ADPKD, confirmed AS or confirmed mutations in MUC1/UMOD were excluded | yield impacted by: positive family history and extra-renal features*

|                    |                                                                                                                                                                                                                 |      |           |    |               |    |    |    |             |                                                  |                                                                                                                                                                                                                                                                                 |      |
|--------------------|-----------------------------------------------------------------------------------------------------------------------------------------------------------------------------------------------------------------|------|-----------|----|---------------|----|----|----|-------------|--------------------------------------------------|---------------------------------------------------------------------------------------------------------------------------------------------------------------------------------------------------------------------------------------------------------------------------------|------|
| [Rao et al., 2019] | clinical suspicion of genetic kidney disease<br><br>glomerulopathy n=554; CAKUT n=159; renal cystic disease n=83; renal tubular disease/renal calcinosis/nephrolithiasis n=159; CKD3-5 with unknown origin n=46 | 1001 | pediatric | NR | 3/1001 (0.3%) | NR | 0% | NR | SNVs + CNVs | 2703 + Mendelian disease associated genes in WES | 421/1001 (42.1%)*<br><br>glomerulopathy 213/510 (41.8%) - from which 117/212 (55.2%) with AS; SRNS 94/281 (33.5%); CAKUT (17.0%); renal cystic disease (61.4%); renal tubular disease/renal calcinosis/nephrolithiasis (62.3%); aHUS (43.2%) CKD3-5 with unknown origin (26.1%) | 2.1% |
|--------------------|-----------------------------------------------------------------------------------------------------------------------------------------------------------------------------------------------------------------|------|-----------|----|---------------|----|----|----|-------------|--------------------------------------------------|---------------------------------------------------------------------------------------------------------------------------------------------------------------------------------------------------------------------------------------------------------------------------------|------|

*Noteworthy: \*VUS of known disease causing genes included in diagnostic yield, through discussion combined with genotype and phenotype | 106 distinct monogenetic disorders detected, 15 accounted for 60.7% of genetic diagnoses | yield impacted by: age of onset, family history (ethnic background)*

|                       |                                                                                                                                                                                     |                                                                                             |      |               |    |    |                                           |    |      |     |                                                                                                                                                                                                                                                                                               |    |
|-----------------------|-------------------------------------------------------------------------------------------------------------------------------------------------------------------------------------|---------------------------------------------------------------------------------------------|------|---------------|----|----|-------------------------------------------|----|------|-----|-----------------------------------------------------------------------------------------------------------------------------------------------------------------------------------------------------------------------------------------------------------------------------------------------|----|
| [Thomas et al., 2020] | patients referred to renal genetics clinic to establish genetic diagnosis<br><br>CAKUT n=4; ciliopathy n=15; glomerular n=12; tubular transport n=8; tubulointerstitial n=2; AS n=1 | 43 patients underwent genetic testing<br><br>(from cohort of 88 families (111 individuals)) | both | 31/42 (73.8%) | NR | NR | NR, mean 39.9 years at genetic evaluation | NR | SNVs | 264 | 26/43 (60.5%)<br><br>45/88 (51.1%) of renal genetics clinic cohort including already known genetic disease (n=19) + evaluation living donor candidates<br><br>AS n=9; ADPKD n=7; FSGS n=2; PAX2-mediated CAKUT n=2; ARPKD n=1; Dent n=1; Frasier n=1; Gordon n=1; Gitelman n=1; Zellweger n=1 | NP |
|-----------------------|-------------------------------------------------------------------------------------------------------------------------------------------------------------------------------------|---------------------------------------------------------------------------------------------|------|---------------|----|----|-------------------------------------------|----|------|-----|-----------------------------------------------------------------------------------------------------------------------------------------------------------------------------------------------------------------------------------------------------------------------------------------------|----|

*Noteworthy: 19 patients referred with known genetic disease; 10 kidney transplant recipients (yield genetic testing 3/10 = 30%), four living kidney donors referred for APOL1 screening, 2 tested positive for two high-risk alleles.*

|                       |                                                                                                                                                                                                                       |                                                      |       |    |    |    |                                       |    |      |     |                                                                                         |    |
|-----------------------|-----------------------------------------------------------------------------------------------------------------------------------------------------------------------------------------------------------------------|------------------------------------------------------|-------|----|----|----|---------------------------------------|----|------|-----|-----------------------------------------------------------------------------------------|----|
| [Benson et al., 2020] | CKD patients referred for renal biopsy - (clear-cut non-genetic disease excluded)<br><br>on biopsy: IgA nephropathy n=20; glomerulonephritis n=8; arteriosclerosis n=6; TMA n=8; TBMN n=5; AS n=1; mixed findings n=2 | 50<br><br>(from cohort of 153 native renal biopsies) | adult | NR | NR | NR | NR, median age at biopsy was 48 years | NR | SNVs | 227 | 2/50 (4.0%)<br><br>2/153 (1.3%) in entire cohort of renal biopsies<br><br>AD COL4A4 n=2 | NP |
|-----------------------|-----------------------------------------------------------------------------------------------------------------------------------------------------------------------------------------------------------------------|------------------------------------------------------|-------|----|----|----|---------------------------------------|----|------|-----|-----------------------------------------------------------------------------------------|----|

*Noteworthy: patients not clinically screened for suspected heritable forms of kidney disease*

|                           |                                                                                        |     |    |                |               |    |                                    |    |             |            |                                                                                |      |
|---------------------------|----------------------------------------------------------------------------------------|-----|----|----------------|---------------|----|------------------------------------|----|-------------|------------|--------------------------------------------------------------------------------|------|
| [Riedhammer et al., 2020] | Tentative clinical diagnosis of hereditary kidney disease - genetically unsolved cases | 174 | NR | 69/174 (39.7%) | 10/174 (5.7%) | NR | NR, median age genetic testing: 19 | NR | SNVs + CNVs | exome wide | 52/174 (29.9%)<br><br>AS 16/34 (47.1%); ADTKD 3/6 (50.0%); CAKUT 8/30 (26.7%); | 3.8% |
|---------------------------|----------------------------------------------------------------------------------------|-----|----|----------------|---------------|----|------------------------------------|----|-------------|------------|--------------------------------------------------------------------------------|------|

AS n=34; ADTKD n=6; CAKUT; n=30; ciliopathy n=19; FSGS/SRNS n=49; VACTERL n=9; other n=27

years range (IQR:7-35)

ciliopathy 9/19 (47.4%); FSGS/SRNS 8/49 (16.3%); VACTERL 0/9 (0%); Other 8/27 (29.6%)

*Noteworthy: 19% of diagnosed cases was a phenocopy | targeted mtDNA analyzed in one patient | yield impacted by: phenotype ADTKD, AS, ciliopathy*

|                       |                                                                                      |                           |       |               |    |    |                                                 |               |      |                        |                                                                                                                         |    |
|-----------------------|--------------------------------------------------------------------------------------|---------------------------|-------|---------------|----|----|-------------------------------------------------|---------------|------|------------------------|-------------------------------------------------------------------------------------------------------------------------|----|
| [Murray et al., 2020] | Suspected familial kidney disease who had undergone percutaneous native renal biopsy | 47 families (75 patients) | adult | 69/75 (92.0%) | NR | NR | NR, median age at biopsy: 36 years range (7-69) | 52/75 (69.3%) | SNVs | 227 or WES or 1 (MUC1) | 39/75 (52.0%)                                                                                                           | NP |
|                       | TIKD n=18; Glomerulonephritis n=15; FSGS/AS n=11; TMA n=17; non-specific n=14        |                           |       |               |    |    |                                                 |               |      |                        | TIKD 13/18 (72.2%); glomerulonephritis 4/15 (26.7%); FSGS/AS 6/11 (54.5%); TMA 10/17 (58.8%); non-specific 6/14 (42.9%) |    |

*Noteworthy: genetic testing resulted in changes in understanding of disease mechanism in 21 individuals (54%) in 12 families (57%). Treatment would have been altered in at least 26% of cases (10/39) | yield impacted by: phenotype TIKD*

|                           |                                                                                                                                                   |                                        |      |                 |               |                |                 |                |             |                                                                                                                         |                                                                                                                                                                                                                                                  |     |
|---------------------------|---------------------------------------------------------------------------------------------------------------------------------------------------|----------------------------------------|------|-----------------|---------------|----------------|-----------------|----------------|-------------|-------------------------------------------------------------------------------------------------------------------------|--------------------------------------------------------------------------------------------------------------------------------------------------------------------------------------------------------------------------------------------------|-----|
| [Jayasinghe et al., 2021] | clinical presentation consistent with likely monogenic cause referred to renal genetics clinic                                                    | 204                                    | both | 117/204 (57.4%) | 11/204 (5.4%) | 53/204 (26.0%) | 123/204 (60.3%) | 52/204 (25.5%) | SNVs + CNVs | depending on phenotype, if negative: panel of 336 kidney genes; panel of ~4000 in patients with extra-renal / syndromic | 80/204 (39.2%)                                                                                                                                                                                                                                   | NR* |
|                           | AS n=43; CAKUT n=14; complement abnormality n=6; cystic n=65; nephrotic n=39; tubular disease n=18; other n=14; nephropathy of unknown origin n=5 | (from cohort of 225 referred patients) |      |                 |               |                |                 |                |             |                                                                                                                         | 81/225 (36.0%) in entire cohort of referred patients<br>AS 24/43 (55.8%); CAKUT 3/14 (21.4%); complement abnormality 0/6 (0%); cystic 31/65 (47.7%); nephrotic 7/39 (17.9%); tubular disease 11/18 (61.1%); other 4/14 (28.6%); Unknown 0/5 (0%) |     |

*Noteworthy: \*CMA routinely performed therefore unable to quantify contribution of CNVs to diagnostic yield (as reported by authors) | Phenotypes (e.g. CAKUT) with low likelihood of monogenic cause, were only included if they had extra-renal features. Patients with a pre-existing molecularly confirmed genetic diagnosis or a phenotype and family history suggestive of typical ADPKD were excluded. | 31/80 (39%) had a change in their clinical diagnosis. WES diagnosis was considered to have contributed to management in 47/80 (59%), including negating the need for diagnostic renal biopsy in 10/80 (13%), changing surveillance in 35/80 (44%), and changing the treatment plan in 16/80 (20%) | yield impacted by: age of onset, positive family history*

|                         |                                                                                                                                                                                      |     |      |                |    |    |                    |              |             |     |                                                                                                                                                           |       |
|-------------------------|--------------------------------------------------------------------------------------------------------------------------------------------------------------------------------------|-----|------|----------------|----|----|--------------------|--------------|-------------|-----|-----------------------------------------------------------------------------------------------------------------------------------------------------------|-------|
| [Mansilla et al., 2021] | consecutive patients who had samples sent in for genetic testing; various phenotypes: CAKUT, cystic diseases, tubulointerstitial disease, transport disorders and glomerular disease | 127 | both | 25/127 (19.7%) | NR | NR | 38/127 (29.9%), NR | 8/127 (6.3%) | SNVs + CNVs | 177 | 54/127 (42.5%)                                                                                                                                            | 18.5% |
|                         | tubular transport n=29; CAKUT n=13; ciliopathy/tubulointerstitial n=32; glomerulopathy n=43; unclassified n=10                                                                       |     |      |                |    |    |                    |              |             |     | tubular transport 13/29 (44.8%); CAKUT 7/13 (53.8%); ciliopathy/tubulointerstitial 17/32 (53.1%); glomerulopathy 14/43 (32.6%); unclassified 3/10 (30.0%) |       |

*Noteworthy: 10.2% of cases genetic testing changed clinical diagnosis | n=9 were X-linked, n=22 were autosomal dominant and n=22 were autosomal recessive | yield impacted by: age of testing*

|                                |                                                                                       |     |      |                 |    |                 |                |    |             |     |                                                                                                                                              |       |
|--------------------------------|---------------------------------------------------------------------------------------|-----|------|-----------------|----|-----------------|----------------|----|-------------|-----|----------------------------------------------------------------------------------------------------------------------------------------------|-------|
| [Domingo-Gallego et al., 2021] | early-onset CKD <30 years with suspected monogenic cause referred for genetic testing | 460 | both | 226/460 (49.1%) | NR | 165/460 (35.9%) | 88/460 (19.1%) | NR | SNVs + CNVs | 316 | 300/460 (65.2%)                                                                                                                              | 10.3% |
|                                | PKD n=208, glomerulopathies n=131, CAKUT n=82, tubulopathies n=33, susp ADTKD n=6     |     |      |                 |    |                 |                |    |             |     | cystic kidney diseases 160/208 (76.9%); glomerulopathies 80/131 (61.1%); CAKUT 31/82 (37.8%); tubulopathies 25/33 (75.8%); ADTKD 4/6 (66.7%) |       |

*Noteworthy: among the 300 genetically diagnosed patients, the clinical diagnosis was confirmed in 77%, a specific diagnosis within a clinical diagnostic group was identified in 15%, and 7% of cases were reclassified. Therefore, in 22% of cases, genetic analysis was crucial in defining the precise etiology of CKD | 55% autosomal dominant disease, 31% autosomal recessive disease and 10% X-linked disease. The remaining 4% presented a suspected complex inheritance pattern, of whom six had a dual molecular diagnosis | yield impacted by: family history, extra-renal features*

|                   |                                                                                                                              |    |      |             |    |    |                                                    |    |             |     |                                                                                                                                               |       |
|-------------------|------------------------------------------------------------------------------------------------------------------------------|----|------|-------------|----|----|----------------------------------------------------|----|-------------|-----|-----------------------------------------------------------------------------------------------------------------------------------------------|-------|
| [Oh et al., 2021] | non-specific nephrogenic symptoms (structural abnormalities, urinalysis abnormalities, electrolyte imbalance, renal failure) | 51 | both | 5/51 (9.8%) | NR | NR | NR, 11.6 years age at inclusion (range 0-46 years) | NR | SNVs + CNVs | 203 | 20/51 (39.2%)                                                                                                                                 | 20.0% |
|                   | structural abnormalities n=16 (n=13 PKD); proteinuria and/or hematuria n=21; electrolyte imbalances n=12; renal failure n=2  |    |      |             |    |    |                                                    |    |             |     | structural abnormalities 9/16 (56.3%); proteinuria and/or hematuria 4/21 (19.0%); electrolyte imbalances 7/12 (58.3%); renal failure 0/2 (0%) |       |

*Noteworthy: initial clinical impression and molecular diagnosis were matched in 11 patients (11/20, 55%) | yield impacted by: positive family history*

|                             |                                                                                                                                                                                 |                                |      |    |    |    |                                                                                                               |    |             |                                     |                                                                                                                                                                                                                                                       |                                               |
|-----------------------------|---------------------------------------------------------------------------------------------------------------------------------------------------------------------------------|--------------------------------|------|----|----|----|---------------------------------------------------------------------------------------------------------------|----|-------------|-------------------------------------|-------------------------------------------------------------------------------------------------------------------------------------------------------------------------------------------------------------------------------------------------------|-----------------------------------------------|
| [Tanudisastro et al., 2021] | patients with suspected genetic kidney disease referred for renal gene panel testing                                                                                            | 542 families (552 individuals) | both | NR | NR | NR | NR, median 17 years old at time of test request (IQR 30)   median pediatric age 6 years   median adult age 36 | NR | SNVs + CNVs | depending on requested panel (1-69) | 189/542 (34.9%)                                                                                                                                                                                                                                       | CNV 5% in pediatric cases; 15% in adult cases |
|                             | requested gene panel: cystinosis n=2; AS n=86; tubulopathies n=68; aHUS/C3 GN n=152; ADTKD n=35; CAKUT n=39; BORS n=5; ARPKD n=12; NS n=106; NPHP&ciliopathies n=66; other n=12 |                                |      |    |    |    |                                                                                                               |    |             |                                     | cystinosis 2/2 (100%); AS 56/86 (65.1%); tubulopathies 30/68 (44.1%); aHUS/C3 GN 28/152 (18.4%); ADTKD 6/35 (17.1%); CAKUT 5/39 (12.8%); BORS 1/5 (20.0%); ARPKD 3/12 (25.0%); NS 33/106 (31.3%); NPHP&ciliopathies 22/66 (33.3%); other 4/12 (33.3%) |                                               |

*Noteworthy: yield impacted by: pediatric cases; phenotype cystinosis & Alport*

|                           |                                                                                             |                         |    |    |    |    |    |    |      |                                              |                                 |                                                                                |
|---------------------------|---------------------------------------------------------------------------------------------|-------------------------|----|----|----|----|----|----|------|----------------------------------------------|---------------------------------|--------------------------------------------------------------------------------|
| [Amlie-Wolf et al., 2021] | patients referred by nephrologists to Genetic Testing Stewardship Program                   | 76 (from cohort of 102) | NR | NR | NR | NR | NR | NR | SNVs | depending on phenotype - no extraneous genes | 28/76 (36.8%)                   | NP                                                                             |
|                           | requested gene panel: C3GN n=3; FSGS n=7; hematuria n=12; hyperoxaluria/oxalosis/cystinosis |                         |    |    |    |    |    |    |      |                                              | 28/102 (27.5%) in entire cohort | requested gene panel: C3GN 0/3 (0%); FSGS 3/7 (42.9%); hematuria 5/12 (41.7%); |



n=5; hypertension n=10; hypophosphatemia n=6; kidney stones n=9; nephrocalcinosis n=4; PKD n=10; renal tubular acidosis n=2; aHUS n=1; other n=2; cascade testing n=15

hyperoxaluria/oxalosis/cystinosis 3/5 (60.0%); hypertension 0/10 (0%); hypophosphatemia 0/6 (0%); kidney stones 1/9 (11.1%); nephrocalcinosis 1/4 (25.0%); PKD 5/10 (50.0%); renal tubular acidosis 0/2 (0%); aHUS 1/1 (100%); other 1/2 (50.0%); cascade testing 6/15 (40.0%)

*Noteworthy: in 27/28 patients the result led to changes in medical management | yield impacted by: phenotype: hematuria, polycystic kidney disease*

|                         |                                                                                                                                                            |                                                                                                          |      |                |    |                |                                                                  |                |             |         |                                                                                                                                                           |      |
|-------------------------|------------------------------------------------------------------------------------------------------------------------------------------------------------|----------------------------------------------------------------------------------------------------------|------|----------------|----|----------------|------------------------------------------------------------------|----------------|-------------|---------|-----------------------------------------------------------------------------------------------------------------------------------------------------------|------|
| [Vaisitti et al., 2021] | clinical suspicion of a monogenic condition or without a well-defined diagnosis                                                                            | 138 (from cohort of 160 in which genetic testing was requested; 22 excluded after a second re-evaluation | both | 67/138 (48.6%) | NR | 49/138 (35.5%) | NR, pediatric mean age 3 years (0-14)   adult mean age 37 (0-80) | 22/138 (15.9%) | SNVs + CNVs | max 225 | 78/138 (56.5%)                                                                                                                                            | 3.8% |
|                         | ciliopathies n=32; glomerular disease n=21; tubular disease n=11; nephrolithiasis/nephrocalcinosis n=2; HUS n=4; unknown origin n=60; other n=5; CAKUT n=3 |                                                                                                          |      |                |    |                |                                                                  |                |             |         | 78/160 (48.8%) in entire cohort                                                                                                                           |      |
|                         |                                                                                                                                                            |                                                                                                          |      |                |    |                |                                                                  |                |             |         | glomerular disease 14/21 (66.7%); ciliopathies 22/32 (68.8%); tubular diseases 4/11 (36.4%); HUS ¼ (25.0%); organ-failure of unknown origin 32/60 (53.3%) |      |

*Noteworthy: authors reported yield including VUS in 35/138 (25.4%) – VUS associated with diseases with autosomal dominant or X-linked recessive (in males) mode of inheritance, while VUS in genes associated with diseases having AR mode of inheritance were reported only if they were in line with the clinical phenotype | yield calculated including only LP+P 43/138 (31.2%) | yield impacted by: phenotype: glomerular disease, ciliopathies*
