# Supplementary material for: Review of genetic testing in kidney disease patients: Diagnostic yield of single nucleotide variants and copy number variations evaluated across and within kidney phenotype groups
Source: PubMed Central journal article supplement — Am J Med Genet C Semin Med Genet. 2022 Sep 26;190(3):358–76. doi: 10.1002/ajmg.c.31995 (PMC9828643; doi:10.1002/ajmg.c.31995), 2022-09-26
Supplement: AJMG-190-358-s004.pdf [file AJMG-190-358-s004.pdf]

aCGH = array comparative genomic hybridization  
ACGS = association for clinical genetic science  
ACMG = American college of medical genetics and genomics  
AD = autosomal dominant  
ADPKD = autosomal dominant polycystic kidney disease  
ADTKD = autosomal dominant tubulo-interstitial kidney disease  
aHUS = atypical hemolytic–uremic syndrome  
APECED = autoimmune polyendocrinopathy-candidiasis–ectodermal dystrophy  
AR = autosomal recessive  
ARPKD = autosomal recessive polycystic kidney disease  
AS = Alport syndrome  
BBS = Bardet-Biedl syndrome  
BOR(S) = branchio-oto-renal (syndrome)  
C3GN = C3 glomerulopathy  
CAKUT = congenital anomalies of kidney and urinary tract  
CKD = chronic kidney disease  
CMA = chromosomal microarray  
CNS = congenital nephrotic syndrome  
CNV = copy number variations  
COL4-NP = COL4-nephropathy  
DDD = dense deposit disease  
DP = definitely pathogenic  
dRTA = distal renal tubular acidosis  
ESKD = end-stage kidney disease  
FH = family history  
FSGS = focal segmental glomerulosclerosis  
FU = follow-up  
GD = genomic disorders  
GN = glomerulonephritis  
GS = Gitelman syndrome  
GWAS = genome-wide association study

HLP = highly likely pathogenic

IgA = immunoglobulin A nephropathy

IQR = interquartile range

JS = Joubert syndrome

JSRD = Joubert syndrome related disorders

LP = likely pathogenic

LR = long-range

KF = kidney failure

KTx = kidney transplantation

MCDK = multicystic dysplastic kidney

Min. = minimum

MKS = Meckel syndrome

MLPA = multiplex ligation-dependent probe amplification

mtDNA = mitochondrial DNA

N/A = not applicable

NGS = next generation sequencing

NP = not performed

NPHP = nephronophthisis

NPHP-RC = nephronophthisis-related ciliopathies

NPHP-RD = nephronophthisis-related disorder

NR = not reported

NS = nephrotic syndrome

P = pathogenic

PCR = polymerase chain reaction

PKD = polycystic kidney disease

PUJ = pelviureteric junction

PUV = posterior urethral valves

QMPSF = quantitative multiplex polymerase chain reaction of short fluorescent

RCAD = renal cyst and diabetes syndrome

RHD = renal hypodysplasia

RRT = renal replacement therapy

SD = standard deviation

SNP-array = single nucleotide polymorphism microarray

SNV = single nucleotide variant

SRNS = steroid-resistant nephrotic syndrome

SSNS = steroid-sensitive nephrotic syndrome

TBMN = thin basement membrane nephropathy

TIKD = tubulointerstitial kidney disease

TMA = thrombotic microangiopathy

TSC = tuberous sclerosis complex

TTP = thrombotic thrombocytopenic purpura

URA = unilateral renal abnormality

VACTERL = acronym including vertebral defects, anal atresia, cardiac defects, tracheo-esophageal fistula, renal anomalies, and limb abnormalities

VEO = very early onset

VNTR = variable number of tandem repeats

VUJ = vesicoureteric junction

VUR = vesicoureteral reflux

VUS = variant of unknown/uncertain significance

WES = whole exome sequencing

WGS = whole genome sequencing

XL = X-linked
