# Supplementary figures and images for: Review of genetic testing in kidney disease patients: Diagnostic yield of single nucleotide variants and copy number variations evaluated across and within kidney phenotype groups
Source: PubMed Central journal article supplement — Am J Med Genet C Semin Med Genet. 2022 Sep 26;190(3):358–76. doi: 10.1002/ajmg.c.31995 (PMC9828643; doi:10.1002/ajmg.c.31995), 2022-09-26

A

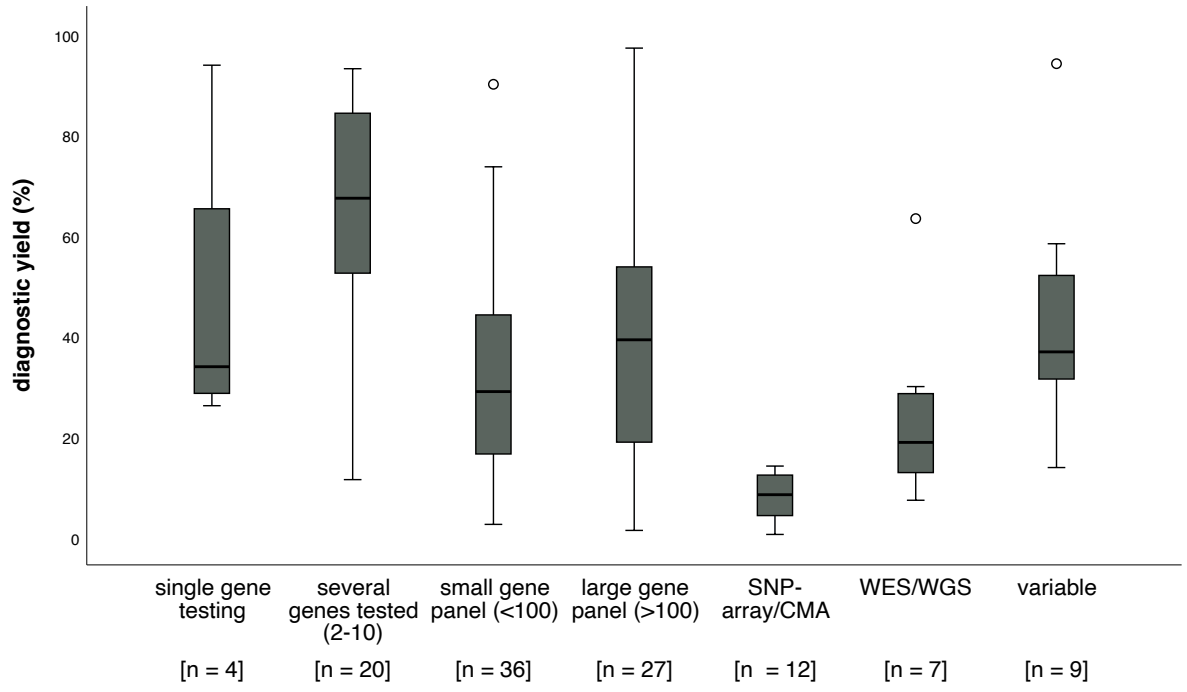

B

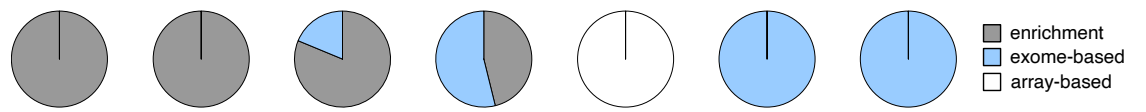

Supplement: AJMG-190-358-s002.pdf [file AJMG-190-358-s002.pdf]

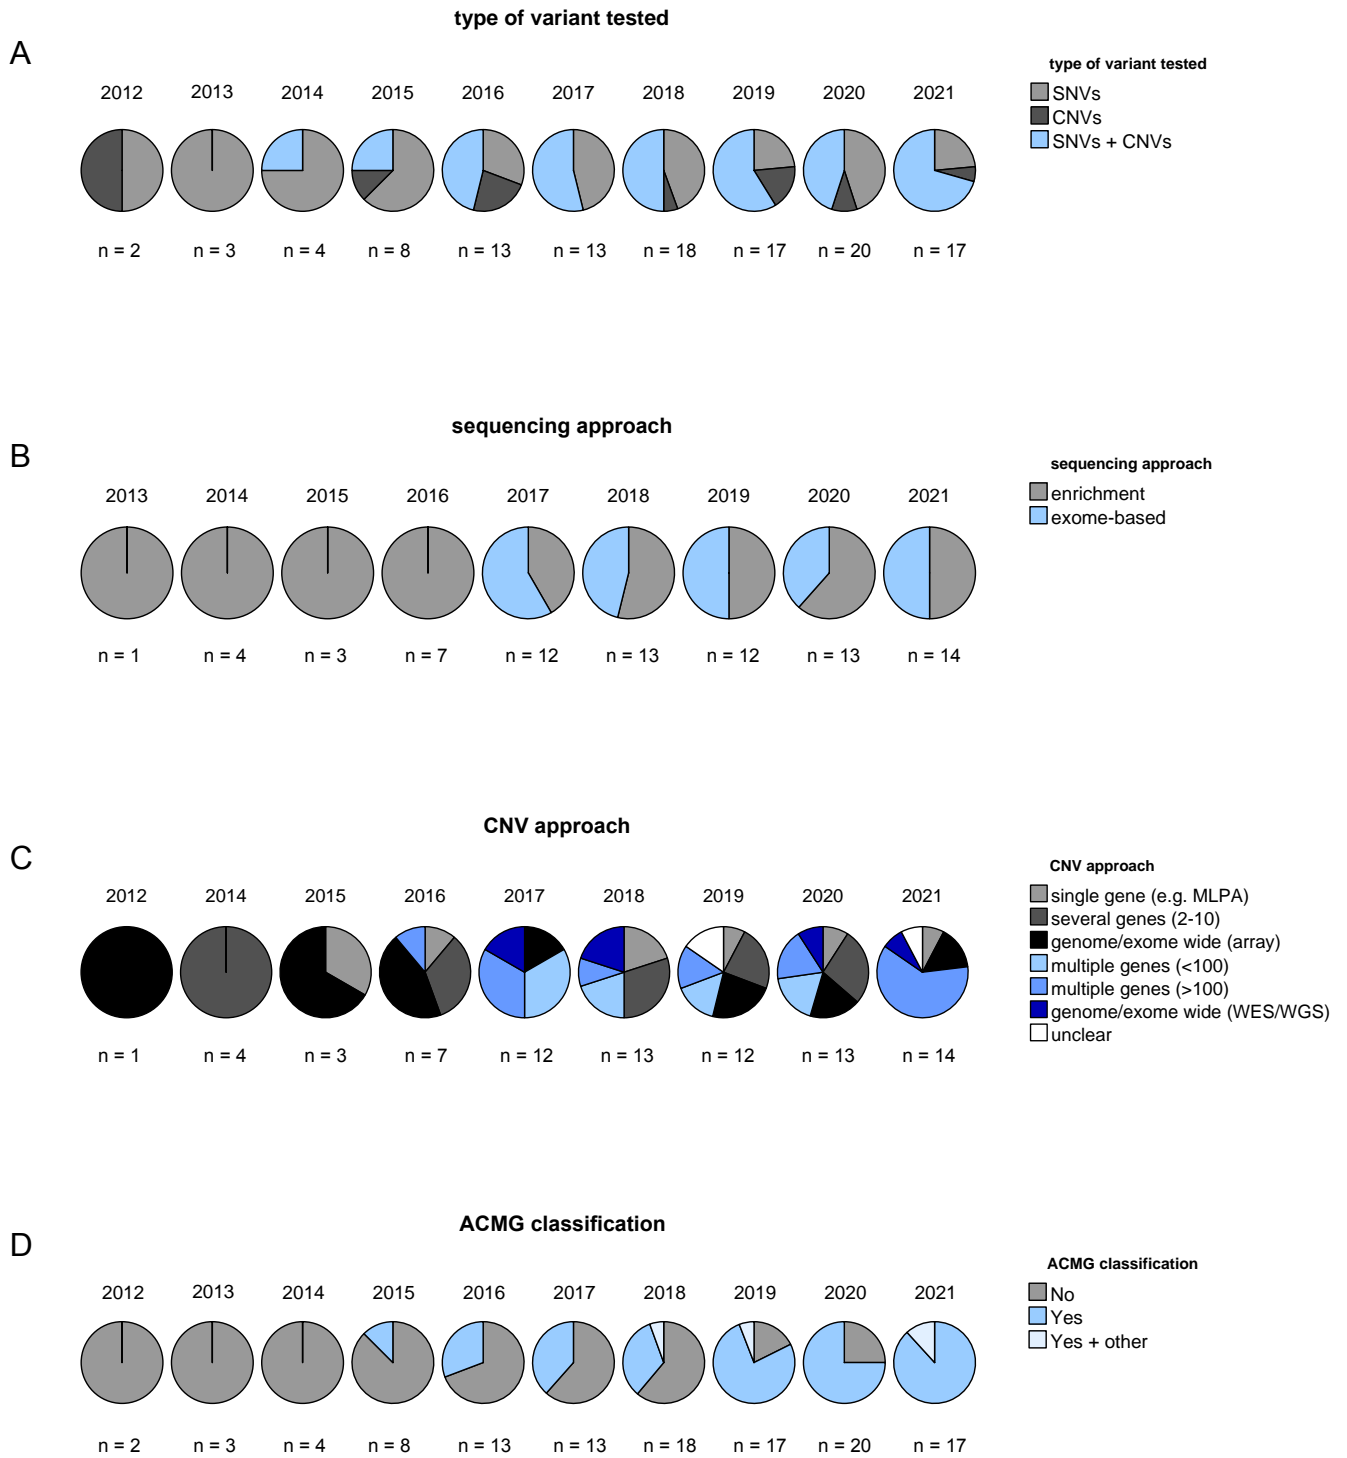

Supplement: AJMG-190-358-s005.pdf [file AJMG-190-358-s005.pdf]
